# Supplementary material for: Adenovirus and RNA-based COVID-19 vaccines’ perceptions and acceptance among healthcare workers in Saudi Arabia: a national survey
Source: PubMed Central journal article supplement — BMJ Open. 2021 Jun 21;11(6):e048586. doi: 10.1136/bmjopen-2020-048586 (PMC8219485; doi:10.1136/bmjopen-2020-048586), 2021-06-21
Supplement: bmjopen-2020-048586.draft_revisions.pdf [file bmjopen-2020-048586.draft_revisions.pdf]

# BMJ Open

BMJ Open is committed to open peer review. As part of this commitment we make the peer review history of every article we publish publicly available.

When an article is published we post the peer reviewers' comments and the authors' responses online. We also post the versions of the paper that were used during peer review. These are the versions that the peer review comments apply to.

The versions of the paper that follow are the versions that were submitted during the peer review process. They are not the versions of record or the final published versions. They should not be cited or distributed as the published version of this manuscript.

BMJ Open is an open access journal and the full, final, typeset and author-corrected version of record of the manuscript is available on our site with no access controls, subscription charges or pay-per-view fees (<http://bmjopen.bmj.com>).

If you have any questions on BMJ Open's open peer review process please email [info.bmjopen@bmj.com](mailto:info.bmjopen@bmj.com)

# BMJ Open

## Adenovirus and RNA-based COVID-19 vaccines: perceptions and acceptance among healthcare workers

|                               |                                                                                                                                                                                                                                                                                                                                                                                                                                                                                                                                                                                                                                                                                                                                                                                                                                                                                                                                                                                                                                                                                                                                                                                                                                                                                                                                                                                                                                                                                                                                                                                                                                                                                                                                                        |
|-------------------------------|--------------------------------------------------------------------------------------------------------------------------------------------------------------------------------------------------------------------------------------------------------------------------------------------------------------------------------------------------------------------------------------------------------------------------------------------------------------------------------------------------------------------------------------------------------------------------------------------------------------------------------------------------------------------------------------------------------------------------------------------------------------------------------------------------------------------------------------------------------------------------------------------------------------------------------------------------------------------------------------------------------------------------------------------------------------------------------------------------------------------------------------------------------------------------------------------------------------------------------------------------------------------------------------------------------------------------------------------------------------------------------------------------------------------------------------------------------------------------------------------------------------------------------------------------------------------------------------------------------------------------------------------------------------------------------------------------------------------------------------------------------|
| Journal:                      | <i>BMJ Open</i>                                                                                                                                                                                                                                                                                                                                                                                                                                                                                                                                                                                                                                                                                                                                                                                                                                                                                                                                                                                                                                                                                                                                                                                                                                                                                                                                                                                                                                                                                                                                                                                                                                                                                                                                        |
| Manuscript ID                 | bmjopen-2020-048586                                                                                                                                                                                                                                                                                                                                                                                                                                                                                                                                                                                                                                                                                                                                                                                                                                                                                                                                                                                                                                                                                                                                                                                                                                                                                                                                                                                                                                                                                                                                                                                                                                                                                                                                    |
| Article Type:                 | Original research                                                                                                                                                                                                                                                                                                                                                                                                                                                                                                                                                                                                                                                                                                                                                                                                                                                                                                                                                                                                                                                                                                                                                                                                                                                                                                                                                                                                                                                                                                                                                                                                                                                                                                                                      |
| Date Submitted by the Author: | 02-Jan-2021                                                                                                                                                                                                                                                                                                                                                                                                                                                                                                                                                                                                                                                                                                                                                                                                                                                                                                                                                                                                                                                                                                                                                                                                                                                                                                                                                                                                                                                                                                                                                                                                                                                                                                                                            |
| Complete List of Authors:     | <p>Temsah, Mohamad-Hani; King Saud University<br/>         Barry, Mazin; King Saud University, Department of Internal Medicine; King Saud University Medical City, Department of Internal Medicine<br/>         Aljamaan, Fadi; King Saud University, Critical Care Department; King Saud University, Critical Care Department<br/>         Alhuzaimi, Abdullah; King Saud University, Cardiac Science Department; King Saud University, Cardiac Science Department<br/>         Al-Eyadhy, Ayman; King Saud University, Pediatric Department<br/>         Saddik , Basema ; University of Sharjah<br/>         Alrabiaah, Abdulkarim; King Saud University, Pediatric Department<br/>         Alsohime, Fahad; King Saud University, Pediatric Department<br/>         Alhaboob, Ali; King Saud University, Pediatric Department<br/>         Alhasan, Khalid; King Saud University, Pediatric Department<br/>         Alaraj, Ali; Qassim University, Department of Medicine<br/>         Halwani, Rabih; University of Sharjah<br/>         Alamro, Nurah; King Saud University, Department of Family and Community Medicine; King Saud University Medical City, Department of Family and Community Medicine<br/>         Al-Shahrani, Fatimah S; King Saud University, Department of Internal Medicine; King Saud University Medical City, Department of Internal Medicine<br/>         Jamal, Amr; King Saud University, Pediatric Department<br/>         Alsubaie, Sarah; King Saud University, Pediatric Department<br/>         Memish, Ziad; Alfaisal University, Hubert Department of Global Health; Emory University Atlanta, Hubert Department of Global Health<br/>         Al-Tawfiq, Jaffar; Indiana University School of Medicine</p> |
| Keywords:                     | COVID-19, IMMUNOLOGY, Anxiety disorders < PSYCHIATRY                                                                                                                                                                                                                                                                                                                                                                                                                                                                                                                                                                                                                                                                                                                                                                                                                                                                                                                                                                                                                                                                                                                                                                                                                                                                                                                                                                                                                                                                                                                                                                                                                                                                                                   |

SCHOLARONE™  
Manuscripts

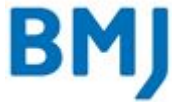

I, the Submitting Author has the right to grant and does grant on behalf of all authors of the Work (as defined in the below author licence), an exclusive licence and/or a non-exclusive licence for contributions from authors who are: i) UK Crown employees; ii) where BMJ has agreed a CC-BY licence shall apply, and/or iii) in accordance with the terms applicable for US Federal Government officers or employees acting as part of their official duties; on a worldwide, perpetual, irrevocable, royalty-free basis to BMJ Publishing Group Ltd ("BMJ") its licensees and where the relevant Journal is co-owned by BMJ to the co-owners of the Journal, to publish the Work in this journal and any other BMJ products and to exploit all rights, as set out in our [licence](#).

The Submitting Author accepts and understands that any supply made under these terms is made by BMJ to the Submitting Author unless you are acting as an employee on behalf of your employer or a postgraduate student of an affiliated institution which is paying any applicable article publishing charge ("APC") for Open Access articles. Where the Submitting Author wishes to make the Work available on an Open Access basis (and intends to pay the relevant APC), the terms of reuse of such Open Access shall be governed by a Creative Commons licence – details of these licences and which [Creative Commons](#) licence will apply to this Work are set out in our licence referred to above.

Other than as permitted in any relevant BMJ Author's Self Archiving Policies, I confirm this Work has not been accepted for publication elsewhere, is not being considered for publication elsewhere and does not duplicate material already published. I confirm all authors consent to publication of this Work and authorise the granting of this licence.

1  
2  
3 Adenovirus and RNA-based COVID-19 vaccines: perceptions and acceptance among healthcare  
4 workers  
5

6  
7 Mohamad-Hani Temsah,<sup>1\*</sup> Mazin Barry,<sup>2\*</sup> Fadi Aljamaan,<sup>3,4,5</sup> Abdullah Alhuzaimi,<sup>3,6</sup> Ayman Al-  
8 Eyadhy,<sup>1</sup> Basema Saddik,<sup>7</sup> Abdulkarim Alrabiaah,<sup>1</sup> Fahad Alsohime,<sup>1</sup> Ali Alhaboob,<sup>1</sup> Khalid  
9 Alhasan,<sup>1</sup> Ali Alaraj,<sup>5,8</sup> Rabih Halwani,<sup>7</sup> Nurah Alamro,<sup>3,9</sup> Fatimah S Al-Shahrani,<sup>2</sup> Amr  
10 Jamal,<sup>3,9,10</sup> Sarah Alsubaie,<sup>1</sup> Ziad A Memish,<sup>11,12</sup> Jaffar A Al-Tawfiq,<sup>13,14,15</sup>  
11  
12

13 <sup>1</sup>Pediatric Department, College of Medicine, King Saud University, Riyadh, Saudi Arabia

14 <sup>2</sup>Division of Infectious Diseases, Department of Internal Medicine, College of Medicine, King  
15 Saud University and King Saud University Medical City, Riyadh, Saudi Arabia

16 <sup>3</sup>College of Medicine, King Saud University, Riyadh, Saudi Arabia

17 <sup>4</sup>Critical Care Department, College of Medicine, King Saud University, Riyadh, Saudi Arabia

18 <sup>5</sup>Dr Sulaiman Al Habib Medical Group, Riyadh, Saudi Arabia

19 <sup>6</sup>Division of Pediatric Cardiology, Cardiac Science Department, College of Medicine, King Saud  
20 University, Riyadh, Saudi Arabia

21 <sup>7</sup>College of Medicine, University of Sharjah, Sharjah, UAE

22 <sup>8</sup>Department of Medicine, College of Medicine, Qassim University, Qassim, Saudi Arabia

23 <sup>9</sup>Department of Family and Community Medicine, King Saud University Medical City, Riyadh,  
24 Saudi Arabia

25 <sup>10</sup>Evidence-Based Health Care & Knowledge Translation Research Chair, King Saud University,  
26 Riyadh, Saudi Arabia

27 <sup>11</sup>Director Research and Innovation Centre, King Saud Medical City, Ministry of Health &  
28 College of Medicine, Alfaisal University, Riyadh, Kingdom of Saudi Arabia

29 <sup>12</sup>Hubert Department of Global Health, Rollins School of Public Health, Emory University,  
30 Atlanta, GA, USA

31 <sup>13</sup>Specialty Internal Medicine and Quality Department, Johns Hopkins Aramco Healthcare,  
32 Dhahran, Saudi Arabia

33 <sup>14</sup>Infectious disease division, Department of Medicine, Indiana University School of Medicine,  
34 IN, USA

35 <sup>15</sup>Infectious Disease Division, Department of Medicine, Johns Hopkins University School of  
36 Medicine, Baltimore, MD, USA  
37  
38

39  
40  
41  
42 \*These authors contributed equally to this research.  
43

44 Correspondence to:

45 Dr Amr Jamal; [amrjamal@ksu.edu.sa](mailto:amrjamal@ksu.edu.sa); [med.researcher.2020@gmail.com](mailto:med.researcher.2020@gmail.com)  
46

47 Keywords: COVID-19, vaccines, information source, anxiety, healthcare workers  
48

49 Word count: Abstract: 277; Text: 2748  
50

51 Ethics approval and consent to participate: The study was approved by the institutional review  
52 board at King Saud University (approval #20/0065/IRB).  
53

54  
55 Consent for publication: All authors gave their consent for publication.  
56  
57  
58  
59  
60

1  
2  
3  
4 Availability of data and materials: All the data for this study will be made available upon  
5 reasonable request.  
6

#### 7 Acknowledgement

8 The authors are grateful to the Deanship of Scientific Research, King Saud University, for  
9 funding through the Vice Deanship of Scientific Research Chairs.  
10  
11

12 Conflict of interest: None declared.  
13

#### 14 Author contributions:

15 MHT, MB, JT, ZM, and FS were involved in conception, analyzed the data, and wrote the  
16 manuscript. AH, AE, FJ, BS, AR, and NA contributed to the study design; collected, analyzed,  
17 and interpreted data; and edited the manuscript. AH, FS, KH, and SS supervised data collection,  
18 analyzed data, and edited the manuscript. AA, RH, and AJ interpreted the data and wrote the  
19 manuscript. All authors reviewed and approved the final version of the manuscript.  
20  
21  
22

#### 23 Author emails and ORCID IDs:

24 Mohamad-Hani Temsah: [mtemsah@ksu.edu.sa](mailto:mtemsah@ksu.edu.sa) (<https://orcid.org/0000-0002-4389-9322>)

25 Mazin Barry [mbarry@ksu.edu.sa](mailto:mbarry@ksu.edu.sa) (<https://orcid.org/0000-0003-2274-007X>)

26 Fadi Aljamaan: [faljamaan@ksu.edu.sa](mailto:faljamaan@ksu.edu.sa) (<https://orcid.org/0000-0001-8404-6652>)

27 Abdullah Alhuzaimi [aalhuzaimi@ksu.edu.sa](mailto:aalhuzaimi@ksu.edu.sa)

28 Ayman Al-Eyadhy: [aleyadhy@ksu.edu.sa](mailto:aleyadhy@ksu.edu.sa) (<https://orcid.org/0000-0002-6051-9125>)

29 Basema Saddik [bsaddik@sharjah.ac.ae](mailto:bsaddik@sharjah.ac.ae) (<https://orcid.org/0000-0002-4682-5927>)

30 Fahad Alsohime: [Falsohime@ksu.edu.sa](mailto:Falsohime@ksu.edu.sa) (<https://orcid.org/0000-0002-4979-3895>)

31 Ali Alhaboob: [drhboob@gmail.com](mailto:drhboob@gmail.com) (<https://orcid.org/0000-0003-2126-7874>)

32 Khalid Alhasan: [kalhasan@ksu.edu.sa](mailto:kalhasan@ksu.edu.sa) (<https://orcid.org/0000-0002-4291-8536>)

33 Abdulkarim Alrabiaah: [alrabiaah@ksu.edu.sa](mailto:alrabiaah@ksu.edu.sa)

34 Ali Alaraj [al\\_araj@hotmail.com](mailto:al_araj@hotmail.com) (<http://orcid.org/0000-0002-7706-2328>)

35 Rabih Halwani: [rhalwani@sharjah.ac.ae](mailto:rhalwani@sharjah.ac.ae)

36 Nurah Alamro: [nmalamro@ksu.edu.sa](mailto:nmalamro@ksu.edu.sa) (<https://orcid.org/0000-0001-9489-3994>)

37 Fatimah S. Al-Shahrani [falshahrani1@ksu.edu.sa](mailto:falshahrani1@ksu.edu.sa)

38 Amr Jamal: [amrjamal@ksu.edu.sa](mailto:amrjamal@ksu.edu.sa) (<https://orcid.org/0000-0002-4051-6592>)

39 Sarah Alsubaie: [salsubaie@ksu.edu.sa](mailto:salsubaie@ksu.edu.sa) (<https://orcid.org/0000-0002-3128-5921>)

40 Ziad A. Memish [zmemish@yahoo.com](mailto:zmemish@yahoo.com)

41 Jaffar A. Al-Tawfiq [jaltawfi@yahoo.com](mailto:jaltawfi@yahoo.com) (<https://orcid.org/0000-0002-5752-2235>)  
42  
43  
44  
45  
46  
47  
48  
49  
50  
51  
52  
53  
54  
55  
56  
57  
58  
59  
60

## ABSTRACT

**Objectives** The aim of this study was to compare the perception, confidence, hesitancy, and acceptance rate of various COVID-19 vaccine types among healthcare workers (HCWs) in Saudi Arabia, a nation with MERS-CoV experience.

**Design** National cross-sectional, pilot-validated questionnaire.

**Setting** Online, self-administered questionnaire among HCWs.

**Participants** A total of 2,007 HCWs working in the Kingdom of Saudi Arabia participated; 75.3% completed the survey and were included in the analysis.

**Intervention** Data were collected through an online survey sent to HCWs during November 1-15, 2020. The main outcome measure was HCW acceptance of COVID-19 candidate vaccines. The associated factors of vaccination acceptance were identified through a logistic regression analysis and via measurement of the level of anxiety, using the generalized anxiety disorder 7 (GAD7) scale.

**Results** Among the 1512 HCWs who were included, 62.4% were women, 70.3% were between 21 and 40 years of age, and the majority (62.2%) were from tertiary hospitals. In addition, 59.5% reported knowing about at least one vaccine; 24.4% of the participants were sure about their willingness to receive the ChAdOx1 nCoV-19 vaccine, and 20.9% were willing to receive the RNA BNT162b2 vaccine. However, 18.3% reported that they would refuse to receive the Ad5-vectored vaccine, and 17.9% would refuse the Gam-COVID-Vac vaccine. Factors that influenced the differential readiness of HCWs included their perceptions of the vaccine's efficiency in preventing the infection (33%), their personal preferences (29%), and the vaccine's manufacturing country (28.6%).

**Conclusions** Awareness by HCWs of the several COVID-19 candidate vaccines could improve their perceptions and acceptance of vaccination. Reliable sources on vaccine efficiency could improve vaccine uptake, so healthcare authorities should use reliable information to decrease vaccine hesitancy among frontline healthcare providers.

### Strengths and limitations of this study

- among the first studies to compare the perception, confidence, hesitancy, and acceptance rates of various COVID-19 vaccine types among HCWs.

- 1  
2  
3 - The press release on the efficacy of the BNT162b2 vaccine coincided with improved HCWs'  
4 willingness to vaccinate.  
5  
6 - Being self-reported and survey-based study highlights that observational studies on the HCWs'  
7 actual acceptance of various COVID-19 vaccines are warranted in the nearest future.  
8  
9  
10  
11  
12

## 13 INTRODUCTION

14  
15 The COVID-19 pandemic has severely disrupted normal societal and economic activities  
16 worldwide and is expected to continue imposing strains and burdens on health systems in most  
17 countries. Globally, the COVID-19 pandemic remains out of control.[1] The existing measures  
18 to control COVID-19 are detrimental to the global economy[2] and result in significant  
19 impairment in physical and psychological well-being.[3] To keep COVID-19 under control  
20 requires an effective vaccine. Without COVID-19 vaccination, healthcare workers (HCWs) will  
21 likely be at risk of infection and are likely to serve as a reservoir inside health institutes, which  
22 would undermine efforts to end the pandemic. According to the World Health Organization  
23 (WHO), 56 and 166 candidate vaccines are in clinical and pre-clinical evaluation, respectively,  
24 as of December 17, 2020.[4] These include JNJ-78436735, an adenovirus vaccine  
25 (Ad26.COV2.S)[5, 6]; mRNA-1273, an mRNA vaccine[7]; AZD1222, an adenovirus vaccine  
26 (ChAdOx1 nCoV-19)[8]; BNT162b1, an mRNA vaccine[9]; NVX-CoV2373, a full-length  
27 recombinant SARS CoV-2 glycoprotein nanoparticle vaccine adjuvanted with Matrix M[10]; and  
28 Ad5-nCoV, an adenovirus vaccine.[11-14] The encouraging news is that several vaccines have  
29 been released; many are in phase III clinical trials and show promising effectiveness.[15] As  
30 some safe and efficacious vaccines became available, policymakers must ensure successful,  
31 large-scale uptake of COVID-19 vaccines to achieve community immunization. However, the  
32 success of COVID-19 vaccination programs will largely depend on people's acceptance of the  
33 vaccine. A recent global survey suggested that nearly 30% of participants would hesitate to take  
34 a COVID-19 vaccine when it is available.[16] A systematic review on the acceptance of a  
35 COVID-19 vaccine, based on nationally representative surveys in 20 nations, indicates that the  
36 vaccine acceptance rate in most nations would not reach the 67% necessary for achieving  
37 population immunity.[17] Mathematic modelling suggested that, if the efficacy of a COVID-19  
38 vaccine was 80%, at least 75% coverage would be needed to extinguish the ongoing  
39  
40  
41  
42  
43  
44  
45  
46  
47  
48  
49  
50  
51  
52  
53  
54  
55  
56  
57  
58  
59  
60



1  
2  
3 pandemic.[18] Therefore, a timely understanding of community responses to the forthcoming  
4 COVID-19 vaccines is important for policymaking and service planning.

5  
6 Extant literature has explored vaccine acceptance and identified a few demographic and  
7 psychosocial correlates, such as gender, age, trust in research, knowledge, and concerns about  
8 the novel vaccine, as well as people's judgment and perceptions about the risk of COVID-  
9 19.[19-21] Risk of exposure is one of several essential issues that directly shape people's  
10 assessments of their vulnerability and risk. Even when using personal protective equipment,  
11 healthcare providers and other essential workers experience high-risk exposures to COVID-19  
12 and should be given priority in vaccine allocations. Several studies suggest that being an HCW  
13 or being involved in the care of patients with COVID-19 is positively associated with COVID-19  
14 vaccine acceptance.[22-24]

15  
16 The lessons learned from previous infectious disease pandemics and outbreaks, including  
17 SARS, H1N1, MERS-CoV, and Ebola outbreaks, demonstrate the important role that health  
18 information has on disease control and vaccine acceptance.[25] Source of health information can  
19 affect the manner and frequency of the utilization of such information. The degree to which the  
20 information source is trusted can have a remarkable impact on the acceptance of information.[26]  
21 If HCWs distrust the source, they will doubt the information about different COVID-19  
22 vaccines, and this doubt will in turn shape the attitudes, perceptions, and potential actions they  
23 take toward various COVID-19 vaccines.

24  
25 The Kingdom of Saudi Arabia (KSA) is one of the top 30 countries with the highest  
26 reported COVID-19 cases: The KSA had 360,690 laboratory-confirmed cases and 6101 deaths as  
27 of December 19, 2020.[27] Acceptance of a potential COVID-19 vaccine assessed among HCWs  
28 in the KSA in a survey of 2007 participants showed an acceptance rate of 70%,[28] which is  
29 slightly higher than the acceptance rate found in a public survey among 992 participants from the  
30 general population (acceptance rate of 65%).[29] Perception of, confidence in, and hesitancy  
31 about various COVID-19 vaccines in the context of emerging viral infections and pandemics and  
32 with regard to manufacturing companies and different sources of information are principal  
33 factors in assessing vaccine acceptance. To the best of our knowledge, no published surveys  
34 specifically target and compare HCW perception, confidence, and hesitancy toward different  
35 types of COVID-19 candidate vaccines. Our previous research showed that most (70%) HCWs  
36 are willing to receive COVID-19 vaccines once they are available,[28] so we aimed in this study



1  
2  
3  
4  
5  
6  
7  
8  
9  
10  
11  
12  
13  
14  
15  
16  
17  
18  
19  
20  
21  
22  
23  
24  
25  
26  
27  
28  
29  
30  
31  
32  
33  
34  
35  
36  
37  
38  
39  
40  
41  
42  
43  
44  
45  
46  
47  
48  
49  
50  
51  
52  
53  
54  
55  
56  
57  
58  
59  
60

to compare the perception, confidence, hesitancy, and acceptance rates of various COVID-19 vaccine types among HCWs.

For peer review only

## METHODS

### Data collection

This study was a national cross-sectional survey among HCWs in Saudi Arabia during the COVID-19 pandemic. Data were collected during November 1–14, 2020. At the time of data collection, at least seven COVID-19 vaccine candidates had been reported in the scientific literature. HCWs were screened for their awareness of any of the seven published vaccines.[28] Participants were invited using a convenience sampling technique. We used several social media platforms and email lists to recruit participants. The survey was a pilot-validated, self-administered questionnaire that was sent to HCWs online through SurveyMonkey<sup>®</sup>, a platform that allows researchers to deploy and analyze surveys via the internet.[30] The questionnaire was adapted from our previously published study,[31] with modifications and additions related to the potential COVID-19 vaccine.

The questions included the demographic characteristics of respondents (job category, age, sex, years of clinical experience, and work area), and any previous exposure to Middle East respiratory syndrome coronavirus (MERS-CoV) or to patients with COVID-19 (either suspected or confirmed). We assessed the following outcomes related to the seven COVID-19 vaccine candidates that had been reported in the scientific literature: knowledge, perceived awareness, and readiness to receive each type of COVID-19 vaccine candidate. In addition, we assessed factors affecting respondents' readiness to receive various COVID-19 vaccine candidates and the HCW's sources of information about COVID-19 vaccines.

Before participation, the purpose of the study was explained in English at the beginning of the online survey. The respondent was given the opportunity to ask questions via a dedicated email address. The institutional review board at the College of Medicine and King Saud University Medical City approved the study (approval #20/0065/IRB). A waiver for signed consent was obtained because the survey presented no more than a minimal risk to participants and involved no procedures for which written consent is usually required outside the study context. To maximize confidentiality, personal identifiers were not required.

HCWs were screened for their awareness of any of the seven published vaccines. Notably, Pfizer announced during the study that the efficacy of their vaccine in the first interim analysis was more than 90%.[32]

### **Patient and Public Involvement**

While this study did not have a direct patient or public involvement, its aim was directed at the healthcare workers' perceptions about the acceptance of COVID-19 vaccines. However, these HCWs are in the frontline of the pandemic, serving to save the lives of thousands of patients worldwide. Therefore, safeguarding HCWs becomes among healthcare and patients' priorities. No patients were directly involved in this research. The results of the study were published as a preprint that was shared with study participants.

### **Statistical analysis**

Descriptive statistics approaches, with means and standard deviations, were applied to continuous variables, and percentages were used for dichotomous variables. The two-sample *t*-test was used to evaluate continuous scores, and the *Z* test was used to compare proportions.

A multivariable logistic regression model was used to explore associations between the outcome variable of HCW knowledge about the available COVID-19 vaccine candidates and HCW demographic, belief toward vaccine candidates, and level of anxiety. The association between predictors and the outcome was expressed as the odds ratio and 95% confidence interval. SPSS (version 21; IBM Corp) was used for the data analysis, Excel (Microsoft) was used for creating figures and depictions, and statistical significance was set at  $p=0.050$ . [33]

## **RESULTS**

A total of 2079 HCWs were invited to participate in the study; 2007 (96.5%) agreed to participate, and 1512 participants (75.3%) were included in the analysis. The participants' sociodemographic characteristics are shown in Table 1.

Women comprised the majority of the population (62.4%), most participants (70.3%) were between 21 and 40 years of age, 68.6% were married—though only 47.3% were living with their families—and 76.2% reported not having any chronic illnesses.

Respondents' working areas were distributed almost evenly across different sectors of health institutions, but the majority were from the public/governmental (47.1%) sectors and tertiary institutions (62.2%). In terms of awareness of potential vaccine candidates reported in the literature, the majority (59.5%) reported knowing about at least one vaccine.

| Table 1: Respondents' Sociodemographic and Professional Characteristics (N=1512) |          |              |
|----------------------------------------------------------------------------------|----------|--------------|
| Characteristic                                                                   | No.      | %            |
| Sex                                                                              |          |              |
| Male                                                                             | 568      | 37.6         |
| Female                                                                           | 944      | 62.4         |
| Age (years), mean (SD)                                                           |          | 37.28 (8.99) |
| 21-30                                                                            | 385      | 25.5         |
| 31-40                                                                            | 677      | 44.8         |
| 41-50                                                                            | 298      | 19.7         |
| ≥50                                                                              | 152      | 10.1         |
| Marital status                                                                   |          |              |
| Single                                                                           | 435      | 28.8         |
| Married, living with family                                                      | 715      | 47.3         |
| Married, living alone                                                            | 322      | 21.3         |
| Widowed or divorced                                                              | 40       | 2.6          |
| Any chronic illness                                                              |          |              |
| No                                                                               | 1152     | 76.2         |
| Yes                                                                              | 360      | 23.8         |
| Clinical role                                                                    |          |              |
| Physician                                                                        | 637      | 42.1         |
| Nurse                                                                            | 757      | 50.1         |
| Other healthcare provider                                                        | 118      | 7.8          |
| Working area                                                                     |          |              |
| Intensive care unit: adults and pediatrics                                       | 216, 115 | 14.3, 7.6    |
| Emergency department                                                             | 152      | 10.1         |
| General ward                                                                     | 406      | 26.9         |
| Isolation ward                                                                   | 57       | 3.8          |
| Outpatient area                                                                  | 319      | 21.1         |
| Other specialized unit: dialysis, lab, pharmacy, radiology                       | 206      | 13.6         |
| Hospital administrative                                                          | 41       | 2.7          |
| Hospital category                                                                |          |              |
| Private                                                                          | 350      | 23.1         |
| Governmental                                                                     | 712      | 47.1         |
| University hospital                                                              | 450      | 29.8         |
| Hospital level of care                                                           |          |              |
| Primary healthcare center                                                        | 210      | 13.9         |
| Secondary-care hospital                                                          | 361      | 23.9         |
| Tertiary hospital                                                                | 941      | 62.2         |

SD: Standard Deviation

The ChAdOx1 nCoV-19 vaccine was the vaccine recognized the most by HCWs (39.3%), followed by the Gam-COVID-Vac vaccine (31.9%) and the RNA BNT162b2 vaccine (30.8%). The least well-known vaccine among HCWs was the mRNA-1273 vaccine (19.9%; Table 2).

HCWs were asked to indicate their readiness to receive each type of COVID-19 vaccine with response categories of never, maybe, or sure (i.e., willing to receive). The vaccine that most HCWs reported they were willing to receive was the AstraZeneca ChAdOx1 nCoV-19 (24.4%), followed by the Pfizer RNA BNT162b2 (20.9%) vaccine. Conversely, HCWs reported that they were most likely to refuse receipt of the CanSino Ad5-vectored (18.3%) and Gamaleya Gam-COVID-Vac (17.9%) vaccines. The respondents reported maybe most often for any vaccine candidate, with maybe responses ranging from 65.1% for the AstraZeneca vaccine to 75.5% for the Moderna mRNA vaccine (Table 2).

| Vaccine Candidate                                                                                                                          | No. (%) Knows About Vaccine* | No. (%) Ready to Take Vaccine |             |            |
|--------------------------------------------------------------------------------------------------------------------------------------------|------------------------------|-------------------------------|-------------|------------|
|                                                                                                                                            |                              | Never                         | Maybe       | Sure       |
| AstraZeneca (Oxford University: British/Swedish) non-replicating viral vector (chimpanzee adenovirus vectored vaccine (ChAdOx1 nCoV-19)    | 594 (39.3)                   | 159 (10.5)                    | 984 (65.1)  | 369 (24.4) |
| Gamaleya (Russia)-Sputnik V non-replicating viral vector adenovirus (Gam-COVID-Vac)                                                        | 482 (31.9)                   | 271 (17.9)                    | 1100 (72.8) | 141 (9.3)  |
| Pfizer RNA (BNT162b2; USA): nucleoside-modified messenger RNA (modRNA)                                                                     | 466 (30.8)                   | 154 (10.2)                    | 1042 (68.9) | 316 (20.9) |
| Johnson and Johnson (USA; adenovirus type 26 vector; Ad26.COV2-S)                                                                          | 422 (27.9)                   | 154 (10.2)                    | 1108 (73.3) | 250 (16.5) |
| CanSino (China; adenovirus type 5; Ad5-vectored)                                                                                           | 397 (26.3)                   | 277 (18.3)                    | 1103 (72.3) | 132 (8.7)  |
| Novavax (USA) protein subunit (full-length recombinant SARS CoV-2 glycoprotein nanoparticle vaccine adjuvanted with Matrix M; NVX-CoV2373) | 364 (24.1)                   | 166 (11)                      | 1139 (75.3) | 208 (13.8) |
| Moderna RNA (USA; mRNA-1273)                                                                                                               | 301 (19.9)                   | 170 (11.2)                    | 1142 (75.5) | 200 (13.2) |

\*Percentage expressed of total sample (N=1512 healthcare workers).

In determining the factors that influenced differential readiness of HCWs to receive the vaccine candidates that had been reported in scientific literature, a multiple-response dichotomies analysis showed that respondents' perceptions of the vaccine candidate as more efficient in preventing infection was the most influencing factor (33%) in their decisions, followed by their personal preferences (29%) and the vaccine's manufacturing country (28.6%). The least influential factors were media and social media coverage (12.3%) and trustworthiness (4.2%; Table 3).

|                                                                         | No. | %    |
|-------------------------------------------------------------------------|-----|------|
| This COVID vaccine(s) seems more efficient in preventing the infection. | 499 | 33   |
| Personal preference                                                     | 439 | 29   |
| Manufacturing country                                                   | 433 | 28.6 |
| Possibly fewer adverse effects from this vaccine                        | 417 | 27.6 |
| Vaccine availability                                                    | 394 | 26.1 |
| Company's reputation                                                    | 395 | 26.1 |
| Media coverage                                                          | 186 | 12.3 |
| Trustworthiness                                                         | 64  | 4.2  |

The HCW's sources of information about COVID-19 vaccines are shown in Table 4. The WHO website was the most utilized source for information (51.1%), followed by social media networks (48.3%), the Saudi Ministry of Health (MOH) website (43.8%), and official press releases (38.3%). The Centers for Disease Control and Prevention website was utilized by only one third of participants (Table 4).

|                                                                                  | No. | %    |
|----------------------------------------------------------------------------------|-----|------|
| WHO website                                                                      | 762 | 51.1 |
| Social networks (e.g., YouTube, Facebook, Twitter, WhatsApp)                     | 719 | 48.3 |
| MOH website                                                                      | 652 | 43.8 |
| Official statements or press releases from MOH (e.g., through SMS or newspapers) | 570 | 38.3 |

|                                                        |     |      |
|--------------------------------------------------------|-----|------|
| Hospital announcements (e.g., roll-ups or newsletters) | 543 | 36.4 |
| Other internet resources                               | 537 | 36   |
| CDC website                                            | 501 | 33.6 |

WHO: World Health Organization, MOH: Ministry of Health, SMS: Short Message Service, CDC: Centers for Disease Control and Prevention

A substantial number of HCWs in this study (n=612, 40.5%) reported unawareness of some vaccine candidates reported in scientific literature as of the time of the study. Therefore, as a secondary analysis, the generalized linear multivariate gamma regression analysis was used to explain the predictors of how likely the surveyed HCWs were to be aware of the different scientifically reported vaccine candidates. These results are presented in Table 5 and show that women knew significantly less than men about the different vaccine candidates (p=0.016). Older age correlated significantly and positively with more knowledge (p=0.027). Also, physicians knew significantly more about vaccine candidates than other HCWs did (p=0.001), and the HCWs from primary and secondary health centers knew of significantly fewer COVID-19 vaccine candidates than did HCWs from tertiary medical centers (p=0.002 for primary, p=0.02 for secondary). The participant's belief in the ability of COVID-19 vaccines to stop the pandemic predicted significantly higher knowledge of the available vaccine candidates (p=0.009). HCWs who did not interact with COVID-19-infected family members knew significantly less about the available vaccine candidates (p=0.018). Other specific worry/anxiety levels and beliefs were assessed, as reported in Table 5

| Parameter                       | Exponentiated ( $\beta$ ) Coefficient | 95% CI for Exponentiated ( $\beta$ ) |       | p-value |
|---------------------------------|---------------------------------------|--------------------------------------|-------|---------|
|                                 |                                       | Lower                                | Upper |         |
| (Intercept)                     | 1.936                                 | 1.442                                | 2.600 | <0.001  |
| Sex=female                      | 0.900                                 | 0.826                                | 0.981 | 0.016   |
| Age (years)                     | 1.005                                 | 1.001                                | 1.009 | 0.027   |
| Clinical role=physician         | 1.267                                 | 1.101                                | 1.458 | 0.001   |
| Clinical role=nurse and Midwife | 0.855                                 | 0.747                                | 0.979 | 0.023   |
| Hospital setup type=primary     | 0.847                                 | 0.763                                | 0.940 | 0.002   |



|                                                                                                                                                    |       |       |       |       |
|----------------------------------------------------------------------------------------------------------------------------------------------------|-------|-------|-------|-------|
| Hospital setup type=secondary                                                                                                                      | 0.904 | 0.830 | 0.984 | 0.020 |
| Hospital sector=private                                                                                                                            | 0.910 | 0.825 | 1.003 | 0.057 |
| Hospital sector=Governmental                                                                                                                       | 0.961 | 0.884 | 1.045 | 0.355 |
| Generalized anxiety, mean score                                                                                                                    | 1.002 | 0.995 | 1.010 | 0.565 |
| Worry level from getting COVID-19 viral infection, mean score                                                                                      | 0.961 | 0.920 | 1.005 | 0.080 |
| Worry level from transmitting COVID-19 viral infection to family, mean score                                                                       | 1.029 | 0.991 | 1.069 | 0.133 |
| Believes the vaccine can stop the disease spread                                                                                                   | 1.073 | 1.018 | 1.132 | 0.009 |
| Believes vaccination prevents COVID-19 complications                                                                                               | 1.046 | 0.994 | 1.100 | 0.087 |
| Does not interact with COVID-19–infected family members                                                                                            | 0.907 | 0.836 | 0.983 | 0.018 |
| NOTE: Dependent variable was the total number of vaccines the HCW knew about. The exponentiated ( $\beta$ ) coefficient was interpreted as a rate. |       |       |       |       |

Our analysis (Fig 1) showed a significantly higher percentage rate of HCW readiness to receive any COVID-19 vaccine relative to the refusal rate after the Pfizer announcement compared to before it ( $\chi^2[1]4.56, p=0.032$ ). This result was similar to HCW readiness to receive the BNT162b2 vaccine (Fig 2).

## DISCUSSION

Since the beginning of the pandemic, an unprecedented global effort to develop a vaccine has been underway; research and development of different technologies have been applied for different vaccine candidates. The effort resulted in several types of vaccine candidates developed with various technologies, including adenovirus and RNA-based vaccines, all of which are novel and have not been developed for wide clinical use in other infectious diseases. Gaining knowledge of such new vaccines, with the rapid evolution of the development process, may be

1  
2  
3 challenging: only 40% of study participants were aware of the ChAdOx1 nCoV-19 vaccine,[5-9,  
4 11, 34, 35] and only one third were aware of the BNT162b2, Gam-COVID-Vac, and  
5 Ad26.COVS-2 vaccines. Only a quarter of participants knew about the remaining vaccines. To  
6 our knowledge, data about HCW knowledge of vaccine candidates has not been published  
7 elsewhere.  
8  
9

10  
11  
12 Acceptance about COVID-19 vaccines in general has been studied. In a global survey in  
13 19 countries about the potential acceptance of a COVID-19 vaccine among the public, 71.5%  
14 reported they would very or somewhat likely agree to receive a vaccine; respondents from China  
15 gave the highest proportion of positive responses (631 [88.6%] of 712 respondents) and the  
16 lowest proportion of negative responses (five [0.7%] of 712) when asked if they would take a  
17 proven, safe, and effective vaccine. Respondents from Poland reported the highest proportion of  
18 negative responses (182 [27.3%] of 666), whereas Russian respondents gave the lowest  
19 proportion of positive responses (373 [54.9%] of 680). Data are available about other diseases  
20 with multiple vaccine types as well. In a parental survey on acceptance of an intranasal, live,  
21 attenuated influenza vaccine, 81% preferred this version compared with the injectable inactivated  
22 influenza vaccine[36]; however no such acceptance rate has been evaluated among HCWs.[37]  
23  
24  
25  
26  
27  
28  
29  
30

31 It is interesting to note that, of all the HCW respondents asked about taking a COVID-19  
32 vaccine, only 20% or 24% preferred to receive the AstraZeneca or the Pfizer vaccine,  
33 respectively. This low response to acceptance of any vaccine in development may indicate  
34 variability in the knowledge and understanding about the different vaccines. Vaccine knowledge  
35 is an area that needs more study to understand variables contributing to acceptance or rejection  
36 of each type of vaccine according to different development platforms used. This understanding  
37 would aid policymakers in the development of appropriate educational materials to boost  
38 confidence in various vaccine platforms.  
39  
40  
41  
42  
43  
44

45 Many factors affect the choice to receive vaccines. In this study, the top reason for  
46 choosing a vaccine was that the vaccine seems more effective at preventing infection (33%). A  
47 previous study found that 50% vaccine efficacy was associated with a 51% rate of  
48 acceptance.[38]  
49  
50

51 The manufacturing country was another reason given for accepting the vaccine (in 28.6%  
52 of respondents). This finding is similar to results from a US survey related to hypothetical  
53 vaccines. The surveyed individuals had lower acceptance of the vaccine if it originated from a  
54  
55  
56  
57  
58  
59  
60

1  
2  
3 country outside the United States.[38] Other contributing factors, such as fewer adverse effects,  
4 were also reported in this study.[38] Understanding these factors is important to build strategies  
5 for vaccine acceptance in any community. Strategies should address concerns, contributing  
6 factors, and misconceptions.[39] Trustworthiness was indicated by approximately 4% of the  
7 respondents as a factor in accepting a COVID-19 vaccine. It is important to note that trust is an  
8 important modifiable element of any successful vaccine campaign. Trustworthiness was strongly  
9 associated with acceptance of COVID-19,[40] and this factor was also related to acceptance of  
10 other vaccines, such as H1N1, SARS, and MERS vaccines.[25]

11  
12 The most-reported sources of information for HCWs were the WHO website and social  
13 networks (as expected in a pandemic). Previously, Alsubaie et al.[41] reported results from the  
14 same HCWs' population, which showed that hospital announcements and MOH official  
15 statements were more commonly sought for information about the MERS-CoV national  
16 outbreak. Seeking knowledge from reliable sources about the pandemic and vaccinations could  
17 significantly impact the HCWs' perceptions of vaccine acceptance. Misinformation about the  
18 COVID-19 vaccine was associated with decreased vaccination acceptance among those who  
19 would otherwise definitely vaccinate.[42]

20  
21 Interestingly, HCWs working in tertiary and academic centers were more knowledgeable  
22 about various vaccine candidates compared with HCWs working in primary and secondary  
23 centers. This result may be explained by more scientific activity and educational campaigns  
24 typically associated with teaching hospitals. This increased knowledge was especially common  
25 among physicians in our study, like other studies; in a cross-sectional survey conducted in Italy  
26 among HCWs to assess their knowledge, attitudes, and practices about vaccinations, physicians  
27 and those who had received information about vaccinations from scientific journals, educational  
28 activities, or professional associations were more likely to have adequate knowledge.[43] The  
29 knowledge differences identified between centers and types of providers highlight the  
30 importance of academic activities and keeping up-to-date with the scientific literature during the  
31 COVID-19 pandemic.

32  
33 Remarkably, after the Pfizer and BioNTech announcement about the efficacy rate of  
34 BNT162b2, the HCWs in our study demonstrated significantly more willingness to undergo  
35 vaccination.[33] This change was despite simultaneous negative news on some COVID-19  
36 vaccination trials, such as the halting of clinical studies with the CoronaVac vaccine by the  
37  
38  
39  
40  
41  
42  
43  
44  
45  
46  
47  
48  
49  
50  
51  
52  
53  
54  
55  
56  
57  
58  
59  
60

1  
2  
3 Brazilian national sanitary regulator (Anvisa) due to a serious adverse event.[44] Vaccine  
4 acceptance is a multifactorial issue, but having positive COVID-19 vaccine trial results  
5 circulating in the news and social media for several days after the press release on the efficacy of  
6 BNT162b2 could improve the HCWs' willingness to vaccinate.  
7  
8  
9

10 This study has the limitation of being self-reported and survey-based, so future  
11 observational studies on the HCWs actual acceptance of various COVID-19 vaccines is  
12 warranted. Another aspect is the national design, that needs further research for external validity  
13 in other countries.  
14  
15  
16

## 17 18 **CONCLUSION**

19 HCW awareness of the several COVID-19 candidate vaccines could improve perception and  
20 acceptance of vaccination. Reliable sources on vaccine efficiency could improve vaccine uptake,  
21 and healthcare authorities should utilize these sources to decrease vaccine hesitancy among  
22 frontline healthcare providers.  
23  
24  
25  
26  
27  
28  
29  
30  
31  
32  
33  
34  
35  
36  
37  
38  
39  
40  
41  
42  
43  
44  
45  
46  
47  
48  
49  
50  
51  
52  
53  
54  
55  
56  
57  
58  
59  
60

## REFERENCES

1. World Health Organization. Coronavirus disease 2019 (COVID-19) situation report – 71. Available from: <https://www.who.int/docs/default-source/coronaviruse/situation-reports/20200331-sitrep-71-covid-19.pdf>. Accessed 15 December 2020.
2. The State Council of the People's Republic of China. COVID-19 sends most G20 members into negative GDP growth, except China 2020. Available from: [http://english.www.gov.cn/news/topnews/202009/05/content\\_WS5f5398c8c6d0f7257693b957.html](http://english.www.gov.cn/news/topnews/202009/05/content_WS5f5398c8c6d0f7257693b957.html). Accessed 15 December 2020.
3. Carvalho Aguiar Melo M, de Sousa Soares D. Impact of social distancing on mental health during the COVID-19 pandemic: an urgent discussion. *Int J Soc Psychiatry* 2020;66:625–6.
4. WHO. Draft landscape of COVID-19 candidate vaccines. Available from: <https://www.who.int/publications/m/item/draft-landscape-of-covid-19-candidate-vaccines>. Accessed 19 December 2020.
5. A Study of Ad26.COV2.S for the prevention of SARS-CoV-2-mediated COVID-19 in adult participants (ENSEMBLE). Available from: <https://clinicaltrials.gov/ct2/show/NCT04505722>. Accessed 2 December 2020.
6. Mullard A. COVID-19 vaccine development pipeline gears up. *Lancet* 2020;395(10239):1751–2. doi: 10.1016/s0140-6736(20)31252-6
7. Anderson EJ, Roupael NG, Widge AT, *et al*. Safety and immunogenicity of SARS-CoV-2 mRNA-1273 vaccine in older adults. *N Engl J Med* 2020;383:2427–38. doi: 10.1056/NEJMoa2028436
8. Folegatti PM, Ewer KJ, Aley PK, *et al*. Safety and immunogenicity of the ChAdOx1 nCoV-19 vaccine against SARS-CoV-2: a preliminary report of a phase 1/2, single-blind, randomised controlled trial. *Lancet* 2020;396(10249):467–8. doi: 10.1016/s0140-6736(20)31604-4
9. Walsh EE, Frenck RW, Jr, Falsey AR, *et al*. Safety and immunogenicity of two RNA-based Covid-19 vaccine candidates. *N Engl J Med* 2020;383:2439–50. doi: 10.1056/NEJMoa2027906
10. Keech C, Albert G, Cho I, *et al*. Phase 1-2 trial of a SARS-CoV-2 recombinant spike protein nanoparticle vaccine. *N Engl J Med* 2020;383:2320–2. doi: 10.1056/NEJMoa2026920
11. Zhu FC, Guan XH, Li YH, *et al*. Immunogenicity and safety of a recombinant adenovirus type-5-vectored COVID-19 vaccine in healthy adults aged 18 years or older: a randomised, double-blind, placebo-controlled, phase 2 trial. *Lancet* 2020;396(10249):479–88. doi: 10.1016/s0140-6736(20)31605-6
12. Bar-Zeev N, Moss WJ. Encouraging results from phase 1/2 COVID-19 vaccine trials. *Lancet* 2020;396(10249):448–9. doi: 10.1016/s0140-6736(20)31611-1
13. Zhu FC, Li YH, Guan XH, *et al*. Safety, tolerability, and immunogenicity of a recombinant adenovirus type-5 vectored COVID-19 vaccine: a dose-escalation, open-label, non-randomised, first-in-human trial. *Lancet* 2020;395(10240):1845–54. doi: 10.1016/s0140-6736(20)31208-3
14. Gao Q, Bao L, Mao H, *et al*. Development of an inactivated vaccine candidate for SARS-CoV-2. *Science* 2020;369(6499):77–81. doi: 10.1126/science.abc1932
15. National Institutes of Health. Promising interim results from clinical trial of

- 1  
2  
3 NIH-Moderna COVID-19 vaccine. Available from: <https://www.nih.gov/news-events/news-releases/promising-interim-results-clinical-trial-nih-moderna-covid-19-vaccine>. Accessed 15  
4 December 2020.  
5  
6  
7 16. Kwok KO, Lai F, Wei WI, *et al*. Herd immunity: estimating the level required to halt the  
8 COVID-19 epidemics in affected countries. *J Infect* 2020;80(6):e32–3. doi:  
9 10.1016/j.jinf.2020.03.027  
10  
11 17. Feleszko W, Lewulis P, Czarnecki A, *et al*. Flattening the curve of COVID-19 vaccine  
12 rejection: a global overview. *SSRN* 2020 DOI: 10.2139/ssrn.3631972  
13  
14 18. Bartsch SM, O'Shea KJ, Ferguson MC, *et al*. Vaccine efficacy needed for a COVID-19  
15 coronavirus vaccine to prevent or stop an epidemic as the sole intervention. *Am J Prev*  
16 *Med* 2020;59(4):493–503. doi: 10.1016/j.amepre.2020.06.011  
17  
18 19. Grech V, Gauci C, Agius S. Vaccine hesitancy among Maltese healthcare workers toward  
19 influenza and novel COVID-19 vaccination. *Early Hum Dev* 2020:105213. doi:  
20 10.1016/j.earlhumdev.2020.105213  
21  
22 20. Palamenghi L, Barelo S, Boccia S, *et al*. Mistrust in biomedical research and vaccine  
23 hesitancy: the forefront challenge in the battle against COVID-19 in Italy. *Eur J*  
24 *Epidemiol* 2020;35(8):785–8. doi: 10.1007/s10654-020-00675-8  
25  
26 21. Wong LP, Alias H, Wong PF, *et al*. The use of the health belief model to assess predictors of  
27 intent to receive the COVID-19 vaccine and willingness to pay. *Hum Vaccin Immunother*  
28 2020;16(9):2204–14. doi: 10.1080/21645515.2020.1790279  
29  
30 22. Detoc M, Bruel S, Frappe P, *et al*. Intention to participate in a COVID-19 vaccine clinical  
31 trial and to get vaccinated against COVID-19 in France during the pandemic. *Vaccine*  
32 2020;38(45):7002–6. doi: 10.1016/j.vaccine.2020.09.041  
33  
34 23. Dror AA, Eisenbach N, Taiber S, *et al*. Vaccine hesitancy: the next challenge in the fight  
35 against COVID-19. *Eur J Epidemiol* 2020;35:775–9.  
36  
37 24. Wang K, Wong ELY, Ho KF, *et al*. Intention of nurses to accept coronavirus disease 2019  
38 vaccination and change of intention to accept seasonal influenza vaccination during the  
39 coronavirus disease 2019 pandemic: a cross-sectional survey. *Vaccine*  
40 2020;38(45):7049–56. doi: 10.1016/j.vaccine.2020.09.021  
41  
42 25. Siegrist M, Zingg A. The role of public trust during pandemics: implications for crisis  
43 communication. *European Psychologist* 2014;19(1):23–32.  
44  
45 26. Freed GL, Clark SJ, Butchart AT, *et al*. Sources and perceived credibility of vaccine-safety  
46 information for parents. *Pediatrics* 2011;127:S107–12. doi: 10.1542/peds.2010-1722P  
47  
48 27. Johns Hopkins University. Coronavirus resource center: COVID-19 map.. Available from:  
49 <https://coronavirus.jhu.edu/map.html>. Accessed 19 December 2020.  
50  
51 28. Barry M, Temsah M-H, Alhuzaimi A, *et al*. COVID-19 vaccine confidence and hesitancy  
52 among healthcare workers: a cross-sectional survey from a MERS-CoV experienced  
53 nation. *medRxiv* 2020:2020.12.09.20246447. doi: 10.1101/2020.12.09.20246447  
54  
55 29. Al-Mohaithef M, Padhi BK. Determinants of COVID-19 vaccine acceptance in Saudi  
56 Arabia: a web-based national survey. *J Multidiscip Healthc* 2020;13:1657–63.  
57  
58 30. Regmi PR, Waithaka E, Paudyal A, *et al*. Guide to the design and application of online  
59 questionnaire surveys. *Nepal J Epidemiol* 2016;6(4):640–4.  
60  
61 31. Temsah MH, Alhuzaimi AN, Alamro N, *et al*. Knowledge, Attitudes, and practices of  
62 healthcare workers during the early COVID-19 Pandemic in a main, academic tertiary  
63 care centre in Saudi Arabia. *Epidemiol Infect* 2020:1–29. doi:  
64 10.1017/S0950268820001958



32. Pfizer. Pfizer and BioNTech announce vaccine candidate against covid-19 achieved success in first interim analysis from phase 3 study. Available from: <https://www.pfizer.com/news/press-release/press-release-detail/pfizer-and-biontech-announce-vaccine-candidate-against>. Accessed 16 December 2020.
33. IBM. SPSS Statistics for Windows, version 21.0. Armonk, NY: IBM Corp.
34. Schwartz JL. Evaluating and deploying Covid-19 vaccines: the Importance of transparency, scientific integrity, and public trust. *N Engl J Med* 2020;383(18):1703–5. doi: 10.1056/NEJMp2026393
35. Bedford J, Enria D, Giesecke J, *et al*. COVID-19: towards controlling of a pandemic. *Lancet* 2020;395(10229):1015–8. doi: 10.1016/s0140-6736(20)30673-5
36. Lazarus JV, Ratzan SC, Palayew A, *et al*. A global survey of potential acceptance of a COVID-19 vaccine. *Nat Med* 2020:1–4. doi: 10.1038/s41591-020-1124-9
37. Marien AG, Hochart A, Lagrée M, *et al*. Parental acceptance of an intranasal vaccine: example of influenza vaccine. *Arch Pediatr* 2019;26(2):71–4. doi: 10.1016/j.arcped.2018.11.002
38. Kreps S, Prasad S, Brownstein JS, *et al*. Factors associated with US adults' likelihood of accepting COVID-19 vaccination. *JAMA Netw Open* 2020;3(10):e2025594. doi: 10.1001/jamanetworkopen.2020.25594
39. Biasio LR. Vaccine hesitancy and health literacy. *Hum Vaccin Immunother* 2017:701–2.
40. Hovland CI, Weiss W. The Influence of source credibility on communication effectiveness. *Public Opinion Quarterly* 1951;15(4):635–50. doi: 10.1086/266350
41. Alsubaie S, Hani Tamsah M, Al-Eyadhy AA, *et al*. Middle East respiratory syndrome coronavirus epidemic impact on healthcare workers' risk perceptions, work and personal lives. *J Infect Dev Ctries* 2019;13(10):920–6. doi: 10.3855/jidc.11753
42. Loomba S, de Figueiredo A, Piatek S, *et al*. Measuring the impact of exposure to COVID-19 vaccine misinformation on vaccine intent in the UK and US. *medRxiv* 2020. doi: <https://doi.org/10.1101/2020.10.22.20217513>
43. Pelullo CP, Della Polla G, Napolitano F, *et al*. Healthcare workers' knowledge, attitudes, and practices about vaccinations: a cross-sectional study in Italy. *Vaccines* 2020;8(2):148.
44. Anvisa. Anvisa halts CoronaVac studies after “serious adverse event.” Available from: <https://agenciabrasil.ebc.com.br/en/saude/noticia/2020-11/anvisa-halts-coronavac-studies-after-grave-adverse-event>. Accessed 15 December 2020.

Figure 1: Readiness to take COVID-19 vaccines, as reported before and after the interim report of the efficacy rate of BNT162b2. \*p=0.032.

Figure 2: The percentage of healthcare workers (HCWs) willing to receive the BNT162b2 vaccine after its efficacy announcement. \*p=0.001.



1  
2  
3  
4  
5  
6  
7  
8  
9  
10  
11  
12  
13  
14  
15  
16  
17  
18  
19  
20  
21  
22  
23  
24  
25  
26  
27  
28  
29  
30  
31  
32  
33  
34  
35  
36  
37  
38  
39  
40  
41  
42  
43  
44  
45  
46  
47  
48  
49  
50  
51  
52  
53  
54  
55  
56  
57  
58  
59  
60

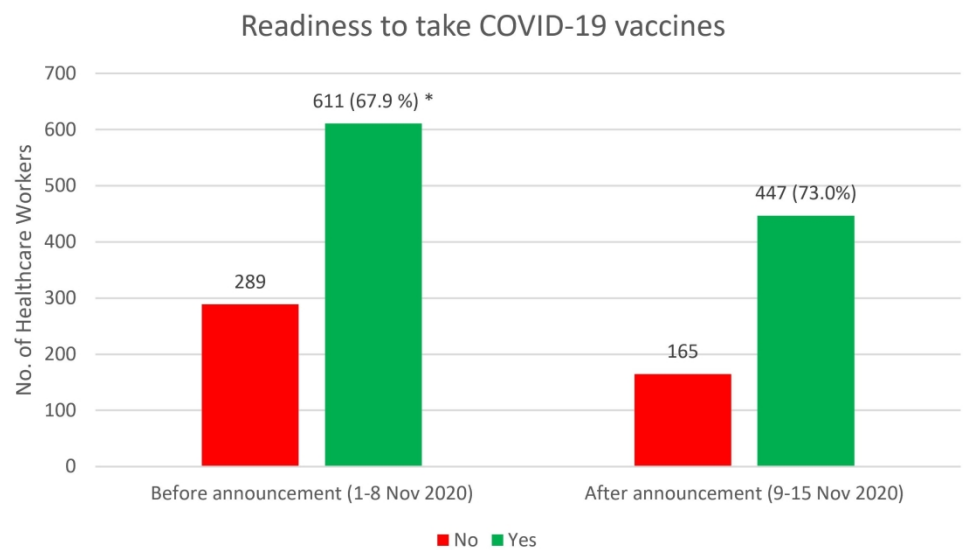

Readiness to take COVID-19 vaccines, as reported before and after the interim report of the efficacy rate of BNT162b2. \*p=0.032.

287x167mm (240 x 240 DPI)

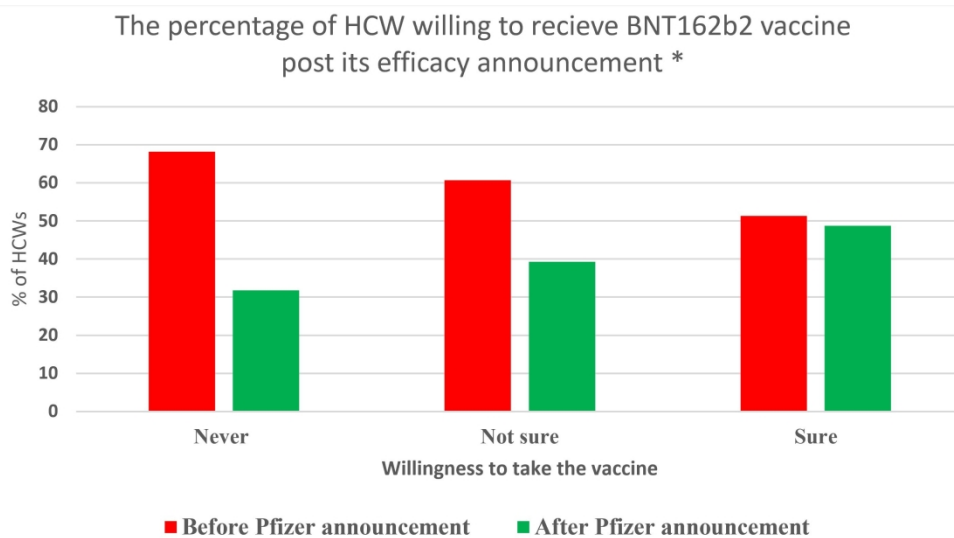

The percentage of healthcare workers (HCWs) willing to receive the BNT162b2 vaccine after its efficacy announcement. \*p=0.001.

310x169mm (240 x 240 DPI)

STROBE Statement—Checklist of items that should be included in reports of *cohort studies*

|                           | Item No | Recommendation                                                                                                                                                                                                                                                                                                         | Page No |
|---------------------------|---------|------------------------------------------------------------------------------------------------------------------------------------------------------------------------------------------------------------------------------------------------------------------------------------------------------------------------|---------|
| <b>Title and abstract</b> | 1       | (a) Indicate the study's design with a commonly used term in the title or the abstract<br>(b) Provide in the abstract an informative and balanced summary of what was done and what was found                                                                                                                          | 3       |
| <b>Introduction</b>       |         |                                                                                                                                                                                                                                                                                                                        |         |
| Background/rationale      | 2       | Explain the scientific background and rationale for the investigation being reported                                                                                                                                                                                                                                   | 4       |
| Objectives                | 3       | State specific objectives, including any prespecified hypotheses                                                                                                                                                                                                                                                       | 5       |
| <b>Methods</b>            |         |                                                                                                                                                                                                                                                                                                                        |         |
| Study design              | 4       | Present key elements of study design early in the paper                                                                                                                                                                                                                                                                | 6       |
| Setting                   | 5       | Describe the setting, locations, and relevant dates, including periods of recruitment, exposure, follow-up, and data collection                                                                                                                                                                                        | 6       |
| Participants              | 6       | (a) Give the eligibility criteria, and the sources and methods of selection of participants. Describe methods of follow-up<br>(b) For matched studies, give matching criteria and number of exposed and unexposed                                                                                                      | 6       |
| Variables                 | 7       | Clearly define all outcomes, exposures, predictors, potential confounders, and effect modifiers. Give diagnostic criteria, if applicable                                                                                                                                                                               | 6       |
| Data sources/measurement  | 8*      | For each variable of interest, give sources of data and details of methods of assessment (measurement). Describe comparability of assessment methods if there is more than one group                                                                                                                                   | 6       |
| Bias                      | 9       | Describe any efforts to address potential sources of bias                                                                                                                                                                                                                                                              | NA      |
| Study size                | 10      | Explain how the study size was arrived at                                                                                                                                                                                                                                                                              | 7       |
| Quantitative variables    | 11      | Explain how quantitative variables were handled in the analyses. If applicable, describe which groupings were chosen and why                                                                                                                                                                                           | 7       |
| Statistical methods       | 12      | (a) Describe all statistical methods, including those used to control for confounding<br>(b) Describe any methods used to examine subgroups and interactions<br>(c) Explain how missing data were addressed<br>(d) If applicable, explain how loss to follow-up was addressed<br>(e) Describe any sensitivity analyses | 7       |
| <b>Results</b>            |         |                                                                                                                                                                                                                                                                                                                        |         |
| Participants              | 13*     | (a) Report numbers of individuals at each stage of study—eg numbers potentially eligible, examined for eligibility, confirmed eligible, included in the study, completing follow-up, and analysed<br>(b) Give reasons for non-participation at each stage<br>(c) Consider use of a flow diagram                        | 7       |
| Descriptive data          | 14*     | (a) Give characteristics of study participants (eg demographic, clinical, social) and information on exposures and potential confounders<br>(b) Indicate number of participants with missing data for each variable of interest<br>(c) Summarise follow-up time (eg, average and total amount)                         | 7-8     |
| Outcome data              | 15*     | Report numbers of outcome events or summary measures over time                                                                                                                                                                                                                                                         | 9       |

|    |                          |    |                                                                                                                                                                                                              |      |
|----|--------------------------|----|--------------------------------------------------------------------------------------------------------------------------------------------------------------------------------------------------------------|------|
| 1  | Main results             | 16 | (a) Give unadjusted estimates and, if applicable, confounder-adjusted estimates and their precision (eg, 95% confidence interval). Make clear which confounders were adjusted for and why they were included | 7-9  |
| 2  |                          |    | (b) Report category boundaries when continuous variables were categorized                                                                                                                                    |      |
| 3  |                          |    | (c) If relevant, consider translating estimates of relative risk into absolute risk for a meaningful time period                                                                                             |      |
| 4  |                          |    |                                                                                                                                                                                                              |      |
| 5  |                          |    |                                                                                                                                                                                                              |      |
| 6  |                          |    |                                                                                                                                                                                                              |      |
| 7  |                          |    |                                                                                                                                                                                                              |      |
| 8  |                          |    |                                                                                                                                                                                                              |      |
| 9  | Other analyses           | 17 | Report other analyses done—eg analyses of subgroups and interactions, and sensitivity analyses                                                                                                               | 9-11 |
| 10 |                          |    |                                                                                                                                                                                                              |      |
| 11 | <b>Discussion</b>        |    |                                                                                                                                                                                                              |      |
| 12 |                          |    |                                                                                                                                                                                                              |      |
| 13 | Key results              | 18 | Summarise key results with reference to study objectives                                                                                                                                                     | 12   |
| 14 | Limitations              | 19 | Discuss limitations of the study, taking into account sources of potential bias or imprecision. Discuss both direction and magnitude of any potential bias                                                   | 14   |
| 15 |                          |    |                                                                                                                                                                                                              |      |
| 16 | Interpretation           | 20 | Give a cautious overall interpretation of results considering objectives, limitations, multiplicity of analyses, results from similar studies, and other relevant evidence                                   | 14   |
| 17 |                          |    |                                                                                                                                                                                                              |      |
| 18 |                          |    |                                                                                                                                                                                                              |      |
| 19 | Generalisability         | 21 | Discuss the generalisability (external validity) of the study results                                                                                                                                        | 14   |
| 20 |                          |    |                                                                                                                                                                                                              |      |
| 21 | <b>Other information</b> |    |                                                                                                                                                                                                              |      |
| 22 | Funding                  | 22 | Give the source of funding and the role of the funders for the present study and, if applicable, for the original study on which the present article is based                                                | 2    |
| 23 |                          |    |                                                                                                                                                                                                              |      |
| 24 |                          |    |                                                                                                                                                                                                              |      |

\*Give information separately for exposed and unexposed groups.

**Note:** An Explanation and Elaboration article discusses each checklist item and gives methodological background and published examples of transparent reporting. The STROBE checklist is best used in conjunction with this article (freely available on the Web sites of PLoS Medicine at <http://www.plosmedicine.org/>, Annals of Internal Medicine at <http://www.annals.org/>, and Epidemiology at <http://www.epidem.com/>). Information on the STROBE Initiative is available at <http://www.strobe-statement.org>.

# BMJ Open

## Adenovirus and RNA-based COVID-19 vaccines' perceptions and acceptance among healthcare workers in Saudi Arabia: A national survey

|                                 |                                                                                                                                                                                                                                                                                                                                                                                                                                                                                                                                                                                                                                                                                                                                                                                                                                                                                                                                                                                                                                                                                                                                                                                                                                                                                                                                                                                                                                                                                                                                                                                                                                                                                                                                                        |
|---------------------------------|--------------------------------------------------------------------------------------------------------------------------------------------------------------------------------------------------------------------------------------------------------------------------------------------------------------------------------------------------------------------------------------------------------------------------------------------------------------------------------------------------------------------------------------------------------------------------------------------------------------------------------------------------------------------------------------------------------------------------------------------------------------------------------------------------------------------------------------------------------------------------------------------------------------------------------------------------------------------------------------------------------------------------------------------------------------------------------------------------------------------------------------------------------------------------------------------------------------------------------------------------------------------------------------------------------------------------------------------------------------------------------------------------------------------------------------------------------------------------------------------------------------------------------------------------------------------------------------------------------------------------------------------------------------------------------------------------------------------------------------------------------|
| Journal:                        | <i>BMJ Open</i>                                                                                                                                                                                                                                                                                                                                                                                                                                                                                                                                                                                                                                                                                                                                                                                                                                                                                                                                                                                                                                                                                                                                                                                                                                                                                                                                                                                                                                                                                                                                                                                                                                                                                                                                        |
| Manuscript ID                   | bmjopen-2020-048586.R1                                                                                                                                                                                                                                                                                                                                                                                                                                                                                                                                                                                                                                                                                                                                                                                                                                                                                                                                                                                                                                                                                                                                                                                                                                                                                                                                                                                                                                                                                                                                                                                                                                                                                                                                 |
| Article Type:                   | Original research                                                                                                                                                                                                                                                                                                                                                                                                                                                                                                                                                                                                                                                                                                                                                                                                                                                                                                                                                                                                                                                                                                                                                                                                                                                                                                                                                                                                                                                                                                                                                                                                                                                                                                                                      |
| Date Submitted by the Author:   | 07-May-2021                                                                                                                                                                                                                                                                                                                                                                                                                                                                                                                                                                                                                                                                                                                                                                                                                                                                                                                                                                                                                                                                                                                                                                                                                                                                                                                                                                                                                                                                                                                                                                                                                                                                                                                                            |
| Complete List of Authors:       | <p>Temsah, Mohamad-Hani; King Saud University<br/>         Barry, Mazin; King Saud University, Department of Internal Medicine; King Saud University Medical City, Department of Internal Medicine<br/>         Aljamaan, Fadi; King Saud University, Critical Care Department; King Saud University, Critical Care Department<br/>         Alhuzaimi, Abdullah; King Saud University, Cardiac Science Department; King Saud University, Cardiac Science Department<br/>         Al-Eyadhy, Ayman; King Saud University, Pediatric Department<br/>         Saddik , Basema ; University of Sharjah<br/>         Alrabiaah, Abdulkarim; King Saud University, Pediatric Department<br/>         Alsohime, Fahad; King Saud University, Pediatric Department<br/>         Alhaboob, Ali; King Saud University, Pediatric Department<br/>         Alhasan, Khalid; King Saud University, Pediatric Department<br/>         Alaraj, Ali; Qassim University, Department of Medicine<br/>         Halwani, Rabih; University of Sharjah<br/>         Alamro, Nurah; King Saud University, Department of Family and Community Medicine; King Saud University Medical City, Department of Family and Community Medicine<br/>         Al-Shahrani, Fatimah S; King Saud University, Department of Internal Medicine; King Saud University Medical City, Department of Internal Medicine<br/>         Jamal, Amr; King Saud University, Pediatric Department<br/>         Alsubaie, Sarah; King Saud University, Pediatric Department<br/>         Memish, Ziad; Alfaisal University, Hubert Department of Global Health; Emory University Atlanta, Hubert Department of Global Health<br/>         Al-Tawfiq, Jaffar; Indiana University School of Medicine</p> |
| <b>Primary Subject Heading</b>: | Infectious diseases                                                                                                                                                                                                                                                                                                                                                                                                                                                                                                                                                                                                                                                                                                                                                                                                                                                                                                                                                                                                                                                                                                                                                                                                                                                                                                                                                                                                                                                                                                                                                                                                                                                                                                                                    |
| Secondary Subject Heading:      | Infectious diseases                                                                                                                                                                                                                                                                                                                                                                                                                                                                                                                                                                                                                                                                                                                                                                                                                                                                                                                                                                                                                                                                                                                                                                                                                                                                                                                                                                                                                                                                                                                                                                                                                                                                                                                                    |
| Keywords:                       | COVID-19, IMMUNOLOGY, Anxiety disorders < PSYCHIATRY                                                                                                                                                                                                                                                                                                                                                                                                                                                                                                                                                                                                                                                                                                                                                                                                                                                                                                                                                                                                                                                                                                                                                                                                                                                                                                                                                                                                                                                                                                                                                                                                                                                                                                   |
|                                 |                                                                                                                                                                                                                                                                                                                                                                                                                                                                                                                                                                                                                                                                                                                                                                                                                                                                                                                                                                                                                                                                                                                                                                                                                                                                                                                                                                                                                                                                                                                                                                                                                                                                                                                                                        |

1  
2  
3  
4  
5  
6  
7  
8  
9  
10  
11  
12  
13  
14  
15  
16  
17  
18  
19  
20  
21  
22  
23  
24  
25  
26  
27  
28  
29  
30  
31  
32  
33  
34  
35  
36  
37  
38  
39  
40  
41  
42  
43  
44  
45  
46  
47  
48  
49  
50  
51  
52  
53  
54  
55  
56  
57  
58  
59  
60

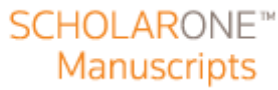



I, the Submitting Author has the right to grant and does grant on behalf of all authors of the Work (as defined in the below author licence), an exclusive licence and/or a non-exclusive licence for contributions from authors who are: i) UK Crown employees; ii) where BMJ has agreed a CC-BY licence shall apply, and/or iii) in accordance with the terms applicable for US Federal Government officers or employees acting as part of their official duties; on a worldwide, perpetual, irrevocable, royalty-free basis to BMJ Publishing Group Ltd ("BMJ") its licensees and where the relevant Journal is co-owned by BMJ to the co-owners of the Journal, to publish the Work in this journal and any other BMJ products and to exploit all rights, as set out in our [licence](#).

The Submitting Author accepts and understands that any supply made under these terms is made by BMJ to the Submitting Author unless you are acting as an employee on behalf of your employer or a postgraduate student of an affiliated institution which is paying any applicable article publishing charge ("APC") for Open Access articles. Where the Submitting Author wishes to make the Work available on an Open Access basis (and intends to pay the relevant APC), the terms of reuse of such Open Access shall be governed by a Creative Commons licence – details of these licences and which [Creative Commons](#) licence will apply to this Work are set out in our licence referred to above.

Other than as permitted in any relevant BMJ Author's Self Archiving Policies, I confirm this Work has not been accepted for publication elsewhere, is not being considered for publication elsewhere and does not duplicate material already published. I confirm all authors consent to publication of this Work and authorise the granting of this licence.



1  
2  
3 Adenovirus and RNA-based COVID-19 vaccines' perceptions and acceptance among healthcare  
4 workers in Saudi Arabia: A national survey  
5  
6  
7

8 Mohamad-Hani Temsah,<sup>1\*</sup> Mazin Barry,<sup>2\*</sup> Fadi Aljamaan,<sup>3,4</sup> Abdullah Alhuzaimi,<sup>3,5</sup> Ayman Al-  
9 Eyadhy,<sup>1</sup> Basema Saddik,<sup>6</sup> Abdulkarim Alrabiaah,<sup>1</sup> Fahad Alsohime,<sup>1</sup> Ali Alhaboob,<sup>1</sup> Khalid  
10 Alhasan,<sup>1</sup> Ali Alaraj,<sup>7,8</sup> Rabih Halwani,<sup>7</sup> Nurah Alamro,<sup>3,9</sup> Fatimah S Al-Shahrani,<sup>2</sup> Amr  
11 Jamal,<sup>3,9,10</sup> Sarah Alsubaie,<sup>1</sup> Ziad A Memish,<sup>11,12</sup> Jaffar A. Al-Tawfiq,<sup>13,14,15</sup>  
12  
13  
14  
15

16  
17  
18 <sup>1</sup>Pediatric Department, College of Medicine, King Saud University, Riyadh, Saudi Arabia

19 <sup>2</sup>Division of Infectious Diseases, Department of Internal Medicine, College of Medicine, King  
20 Saud University and King Saud University Medical City, Riyadh, Saudi Arabia  
21

22 <sup>3</sup>College of Medicine, King Saud University, Riyadh, Saudi Arabia  
23

24 <sup>4</sup>Critical Care Department, College of Medicine, King Saud University, Riyadh, Saudi Arabia  
25

26 <sup>5</sup> Division of Pediatric Cardiology, Cardiac Science Department, College of Medicine, King  
27 Saud University, Riyadh, Saudi Arabia  
28

29 <sup>6</sup> College of Medicine, University of Sharjah, Sharjah, UAE  
30

31 <sup>7</sup> Department of Medicine, College of Medicine, Qassim University, Qassim, Saudi Arabia  
32

33 <sup>8</sup> Dr Sulaiman Al Habib Medical Group, Riyadh, Saudi Arabia  
34

35 <sup>9</sup> Department of Family and Community Medicine, King Saud University Medical City, Riyadh,  
36 Saudi Arabia  
37

38 <sup>10</sup>Evidence-Based Health Care & Knowledge Translation Research Chair, King Saud University,  
39 Riyadh, Saudi Arabia  
40

41 <sup>11</sup>Director Research and Innovation Centre, King Saud Medical City, Ministry of Health &  
42 College of Medicine, Alfaisal University, Riyadh, Kingdom of Saudi Arabia  
43

44 <sup>12</sup>Hubert Department of Global Health, Rollins School of Public Health, Emory University,  
45 Atlanta, GA, USA  
46

47 <sup>13</sup>Specialty Internal Medicine and Quality Department, Johns Hopkins Aramco Healthcare,  
48 Dhahran, Saudi Arabia  
49

50 <sup>14</sup>Infectious disease division, Department of Medicine, Indiana University School of Medicine,  
51 IN, USA  
52  
53  
54  
55  
56  
57  
58  
59  
60

1  
2  
3 <sup>15</sup>Infectious Disease Division, Department of Medicine, Johns Hopkins University School of  
4 Medicine, Baltimore, MD, USA  
5  
6  
7

8 \*These authors contributed equally to this research.  
9

10  
11 Correspondence to:

12 Dr Amr Jamal; [amrjamal@ksu.edu.sa](mailto:amrjamal@ksu.edu.sa); [med.researcher.2020@gmail.com](mailto:med.researcher.2020@gmail.com)  
13  
14  
15

16  
17 Keywords: COVID-19, vaccines, information source, anxiety, healthcare workers  
18  
19

20 Word count: Abstract: 279; Text: 3226  
21

22  
23 Ethics approval and consent to participate: The study was approved by the institutional review  
24 board at King Saud University (approval #20/0065/IRB).  
25  
26

27  
28 Consent for publication: All authors gave their consent for publication.  
29  
30

31 Availability of data and materials: All the data for this study will be made available upon  
32 reasonable request.  
33  
34

35  
36 Acknowledgement

37  
38 We thank all the healthcare workers who participated in this survey and all those in the COVID-  
39 19 front lines. We also thank hodhodata.com for their statistical analysis and support.  
40  
41

42  
43 Funding: The authors are grateful to the Deanship of Scientific Research, King Saud University,  
44 for funding through the Vice Deanship of Scientific Research Chairs. Award/Grant number is not  
45 applicable.  
46  
47  
48

49  
50 Conflict of interest: None declared.  
51  
52

53  
54 Author contributions:  
55  
56  
57  
58  
59  
60

MH.Temsah, M.Barry, J.Al-Tawfiq, Z.Memish, and F.Alsohime were involved in conception, analyzed the data, and wrote the manuscript. A.Alhuzaimi, A.Al-Eyadhy, F.Aljamaan, B.Saddik, A.Alrabiaah, and N.Alamro contributed to the study design; collected, analyzed, and interpreted data; and edited the manuscript. A.Alhuzaimi, F.Al-Shahrani, K.Alhasan, A.Alrabiaah, A.Alaraj, A.Alhaboob and S.Asubaie supervised data collection, analyzed data, and edited the manuscript. A.Al-Eyadhy, R.Halwani, and A.Jamal interpreted the data and wrote the manuscript. All authors reviewed and approved the final version of the manuscript.

#### **Author emails and ORCID IDs:**

Mohamad-Hani Temsah [mtemsah@ksu.edu.sa](mailto:mtemsah@ksu.edu.sa) (<https://orcid.org/0000-0002-4389-9322>)

Mazin Barry [mbarry@ksu.edu.sa](mailto:mbarry@ksu.edu.sa) (<https://orcid.org/0000-0003-2274-007X>)

Fadi Aljamaan [faljamaan@ksu.edu.sa](mailto:faljamaan@ksu.edu.sa) (<https://orcid.org/0000-0001-8404-6652>)

Abdullah Alhuzaimi [aalhuzaimi@ksu.edu.sa](mailto:aalhuzaimi@ksu.edu.sa)

Ayman Al-Eyadhy [aleyadhy@ksu.edu.sa](mailto:aleyadhy@ksu.edu.sa) (<https://orcid.org/0000-0002-6051-9125>)

Basema Saddik [bsaddik@sharjah.ac.ae](mailto:bsaddik@sharjah.ac.ae) (<https://orcid.org/0000-0002-4682-5927>)

Fahad Alsohime [Falsohime@ksu.edu.sa](mailto:Falsohime@ksu.edu.sa) (<https://orcid.org/0000-0002-4979-3895>)

Ali Alhaboob [drhboob@gmail.com](mailto:drhboob@gmail.com) (<https://orcid.org/0000-0003-2126-7874>)

Khalid Alhasan [kalhasan@ksu.edu.sa](mailto:kalhasan@ksu.edu.sa) (<https://orcid.org/0000-0002-4291-8536>)

Abdulkarim Alrabiaah [alrabiaah@ksu.edu.sa](mailto:alrabiaah@ksu.edu.sa)

Ali Alaraj [al\\_araj@hotmail.com](mailto:al_araj@hotmail.com) (<http://orcid.org/0000-0002-7706-2328>)

Rabih Halwani [rhalwani@sharjah.ac.ae](mailto:rhalwani@sharjah.ac.ae)

Nurah Alamro [nmalamro@ksu.edu.sa](mailto:nmalamro@ksu.edu.sa) (<https://orcid.org/0000-0001-9489-3994>)

Fatimah S. Al-Shahrani [falshahrani1@ksu.edu.sa](mailto:falshahrani1@ksu.edu.sa)

Amr Jamal [amrjamal@ksu.edu.sa](mailto:amrjamal@ksu.edu.sa) (<https://orcid.org/0000-0002-4051-6592>)

Sarah Alsubaie [salsubaie@ksu.edu.sa](mailto:salsubaie@ksu.edu.sa) (<https://orcid.org/0000-0002-3128-5921>)

Ziad A. Memish [zmemish@yahoo.com](mailto:zmemish@yahoo.com)

Jaffar A. Al-Tawfiq [jaltawfi@yahoo.com](mailto:jaltawfi@yahoo.com) (<https://orcid.org/0000-0002-5752-2235>)

## ABSTRACT

**Objectives** The aim of this study was to compare the perception, confidence, hesitancy, and acceptance rate of various COVID-19 vaccine types among healthcare workers (HCWs) in Saudi Arabia, a nation with MERS-CoV experience.

**Design** National cross-sectional, pilot-validated questionnaire.

**Setting** Online, self-administered questionnaire among HCWs.

**Participants** A total of 2,007 HCWs working in the Kingdom of Saudi Arabia participated; 1512 (75.3%) participants completed the survey and were included in the analysis.

**Intervention** Data were collected through an online survey sent to HCWs during November 1-15, 2020. The main outcome measure was HCW acceptance of COVID-19 candidate vaccines. The associated factors of vaccination acceptance were identified through a logistic regression analysis and via measurement of the level of anxiety, using the generalized anxiety disorder 7 (GAD7) scale.

**Results** Among the 1512 HCWs who were included, 62.4% were women, 70.3% were between 21 and 40 years of age, and the majority (62.2%) were from tertiary hospitals. In addition, 59.5% reported knowing about at least one vaccine; 24.4% of the participants were sure about their willingness to receive the ChAdOx1 nCoV-19 vaccine, and 20.9% were willing to receive the RNA BNT162b2 vaccine. However, 18.3% reported that they would refuse to receive the Ad5-vectored vaccine, and 17.9% would refuse the Gam-COVID-Vac vaccine. Factors that influenced the differential readiness of HCWs included their perceptions of the vaccine's efficiency in preventing the infection (33%), their personal preferences (29%), and the vaccine's manufacturing country (28.6%).

**Conclusions** Awareness by HCWs of the several COVID-19 candidate vaccines could improve their perceptions and acceptance of vaccination. Reliable sources on vaccine efficiency could improve vaccine uptake, so healthcare authorities should use reliable information to decrease vaccine hesitancy among frontline healthcare providers.

### Strengths and limitations of this study

- The research is among the first studies to explore the perception, confidence, hesitancy, and acceptance rates of various COVID-19 vaccine types among HCWs.
- This is a national, cross-sectional survey among healthcare workers.

- The press release on the efficacy of the BNT162b2 vaccine coincided with ongoing data collection about the HCWs' willingness to vaccinate.
- Being a self-reported and survey-based study highlights that observational studies on the HCWs' actual acceptance of various COVID-19 vaccines are warranted in the nearest future.
- The convenience sample could limit the generalizability; therefore, further research is warranted.

## INTRODUCTION

The COVID-19 pandemic has severely disrupted normal societal and economic activities worldwide and is expected to continue imposing strains and burden on health systems in most of countries. Globally, the COVID-19 pandemic remains out of control.<sup>1</sup> The existing measures to control COVID-19 are detrimental to the global economy<sup>2</sup> and result in significant impairment in physical and psychological wellbeing.<sup>3</sup> To keep COVID-19 under control there is a strong need for an effective vaccine. Without COVID-19 vaccination, health care workers (HCWs) will likely be at risk and are likely to serve as reservoir inside health institutes, which would undermine efforts to end the pandemic. According to the World Health Organization (WHO), there are 56 and 166 candidate vaccines in clinical and pre-clinical evaluation by December 17, 2020.<sup>4</sup> These include JNJ-78436735 an adenovirus vaccine (Ad26.COV2.S),<sup>5,6</sup> mRNA-1273 an mRNA vaccine,<sup>7</sup> AZD1222 an adenovirus vaccine (ChAdOx1 nCoV-19),<sup>8</sup> BNT162b1 an mRNA vaccine,<sup>9</sup> NVX-CoV2373 a full-length recombinant SARS CoV-2 glycoprotein nanoparticle vaccine adjuvanted with Matrix M,<sup>10</sup> Ad5-nCoV an adenovirus vaccine.<sup>11-14</sup> Encouraging news is that several vaccines had been released and many are in phase 3 clinical trials and showing promising effectiveness.<sup>15</sup> As some safe and efficacious vaccines became available, policy makers need to ensure a successful large-scale uptake of COVID-19 vaccines to achieve community immunization. However, the success of COVID-19 vaccination programs will largely depend on people's acceptance of the vaccine. A recent global survey suggested that nearly 30% of participants would be hesitant to take a COVID-19 vaccine when it is available.<sup>16</sup> A systematic review on acceptance of a COVID-19 vaccine based on nationally representative

1  
2  
3 surveys in 20 nations indicates that vaccine acceptance rate in most nations would not reach 67%  
4 that is necessary for achieving population immunity.<sup>17</sup> Mathematic modelling suggested that if a  
5 COVID-19 vaccine efficacy was 80%, the coverage must achieve at least 75% to extinguish the  
6 ongoing pandemic.<sup>18</sup> Therefore, a timely understanding of community responses to the  
7 forthcoming COVID-19 vaccines would be important for policy making and service planning.  
8  
9

10  
11  
12 Extant literature has explored vaccine acceptance and identified a few demographic and  
13 psychosocial correlates such as gender, age, trust in research, knowledge, and concerns about the  
14 novel vaccine, as well as people's judgment and perceptions regarding risk of COVID-19.<sup>19-21</sup>  
15 Risk exposure to the disease is one of several essential issues that directly shape people's  
16 assessment to their vulnerability and risk. Even being weaponed with personal protective  
17 equipment, healthcare providers and other essential workers are considered to have high risk  
18 exposures to COVID-19 and given priority in vaccine allocations. Several studies suggest that  
19 being a healthcare worker or being involved in the care of COVID-19 patients is positively  
20 associated with COVID-19 vaccine acceptance.<sup>22-24</sup>  
21  
22  
23  
24  
25  
26  
27

28  
29 The lessons learned from previous infectious disease pandemics and outbreaks, including  
30 SARS, H1N1, MERS-CoV and Ebola demonstrate the important role that health information has  
31 on disease control and vaccine acceptance.<sup>25</sup> Source of health information can affect the manner  
32 and frequency of the utilization of such information. The degree to which the information source  
33 is trusted can have a remarkable impact on the acceptance of information.<sup>26</sup> If HCWs distrust the  
34 source, they will doubt the information regarding different COVID 19 vaccines, and this doubt  
35 will in turn shape their attitudes, perceptions, and potential actions they take toward various  
36 COVID 19 vaccines.  
37  
38  
39  
40  
41  
42

43 The Kingdom of Saudi Arabia (KSA) is one of the top thirty countries with the highest  
44 reported COVID-19 cases: 360,690 laboratory confirmed cases and 6101 deaths as of December  
45 19, 2020.<sup>27</sup> Acceptance of a potential COVID-19 vaccine assessed among HCWs in KSA in a  
46 survey of 2007 participants showed an acceptance rate of 70%,<sup>28</sup> which is slightly higher than the  
47 acceptance rate found in public survey among 992 participants of general population (acceptance  
48 rate of 65%).<sup>29</sup> Perception, confidence, and hesitancy for various COVID 19 vaccines in the  
49 context of emerging viral infections and pandemics and manufacturing company and the  
50 different sources of information are principal factors in assessing vaccine acceptance of various  
51  
52  
53  
54  
55  
56  
57  
58  
59  
60

1  
2  
3 types. To the best of our knowledge, none of published surveys specifically targeted and  
4 compared HCWs perception, confidence, and hesitancy toward different types of COVID 19  
5 candidate vaccines. While our previous research showed that most (70%) HCWs are willing to  
6 receive COVID-19 vaccines once available,<sup>28</sup> we aimed in this study to compare the perception,  
7 confidence, hesitancy, and acceptance rate of various COVID 19 vaccines types among HCWs.  
8  
9  
10  
11  
12  
13  
14  
15  
16  
17  
18  
19  
20  
21  
22  
23  
24  
25  
26  
27  
28  
29  
30  
31  
32  
33  
34  
35  
36  
37  
38  
39  
40  
41  
42  
43  
44  
45  
46  
47  
48  
49  
50  
51  
52  
53  
54  
55  
56  
57  
58  
59  
60



## METHODS

### Data Collection

This study was a national cross-sectional survey among healthcare workers (HCWs) in Saudi Arabia during COVID-19 pandemic. Data were collected during 4-14, November 2020. At the time of data collection, at least seven COVID-19 vaccine candidates had been reported in the scientific literature. HCWs were screened for their awareness of any of the seven published vaccines<sup>28</sup>. Participants were invited using a convenience sampling technique. We used several social media platforms and email lists to recruit participants for direct invitation. The survey was a pilot-validated, self-administered questionnaire that was sent to HCWs online through SurveyMonkey<sup>®</sup>, a platform that allows researchers to deploy and analyze surveys via the internet.<sup>30</sup> The English questionnaire (as invited participants were multinational and all were English speakers) (Appendix 1)<sup>31</sup> with modifications and additions related to the potential COVID-19 vaccine.

The questions included the demographic characteristics of respondents (job category, age, sex, years of clinical experience, and work area), and any previous exposure to Middle East respiratory syndrome coronavirus (MERS-CoV) or to patients with COVID-19 (either suspected or confirmed). We assessed the following outcomes related to the seven COVID-19 vaccine candidates that had been reported in the scientific literature: knowledge, perceived awareness, and readiness to receive each type of COVID-19 vaccine candidate. In addition, we assessed factors affecting respondents' readiness to receive various COVID-19 vaccine candidates and the HCW's sources of information about COVID-19 vaccines.

Before participation, the purpose of the study was explained in English at the beginning of the online survey. The respondent was given the opportunity to ask questions via a dedicated email address. The institutional review board at the College of Medicine and King Saud University Medical City approved the study (approval #20/0065/IRB). A waiver for signed consent was obtained because the survey presented no more than a minimal risk to participants and involved no procedures for which written consent is usually required outside the study context. To maximize confidentiality, personal identifiers were not required.

1  
2  
3 HCWs were screened for their awareness of any of the seven published vaccines. Notably, Pfizer  
4 announced during the study that the efficacy of their vaccine in the first interim analysis was more  
5 than 90%.<sup>32</sup>  
6  
7

### 8 9 **Patient and Public Involvement**

10  
11 While this study did not have a direct patient or public involvement, its aim was directed at the  
12 healthcare workers' perceptions about the acceptance of COVID-19 vaccines. However, these  
13 HCWs are in the frontline of the pandemic, serving to save the lives of thousands of patients  
14 worldwide. Therefore, safeguarding HCWs becomes among healthcare and patients' priorities.  
15 No patients were directly involved in this research. The results of the study were published as a  
16 preprint that was shared with study participants.  
17  
18  
19  
20  
21  
22  
23

### 24 **Statistical analysis**

25  
26 Descriptive statistics approaches, with means and standard deviations, were applied to  
27 continuous variables, and percentages were used for dichotomous variables. The two-sample *t*-  
28 test was used to evaluate continuous scores, and the *Z* test was used to compare proportions.  
29  
30  
31

32 A multivariable logistic regression model was used to explore associations between the  
33 outcome variable of HCW knowledge about the available COVID-19 vaccine candidates and  
34 HCW demographic, belief toward vaccine candidates, and level of anxiety. The association  
35 between predictors and the outcome was expressed as the odds ratio and 95% confidence interval.  
36 SPSS (version 21; IBM Corp) was used for the data analysis, Excel (Microsoft) was used for  
37 creating figures and depictions, and statistical significance was set at  $p=0.050$ .<sup>33</sup>  
38  
39  
40  
41  
42  
43  
44  
45  
46  
47  
48  
49  
50  
51  
52  
53  
54  
55  
56  
57  
58  
59  
60

## RESULTS

A total of 2007 HCWs agreed to participate, and 1512 participants (75.3%) completed the survey and were included in the analysis. Almost quarter of respondents did not complete the survey and were excluded from analysis. The participants' sociodemographic characteristics are shown in Table 1.

Women comprised most of the population (62.4%), most participants (70.3%) were between 21 and 40 years of age, 68.6% were married—though only 47.3% were living with their families—and 76.2% reported not having any chronic illnesses. Respondents' working areas were distributed almost evenly across different sectors of health institutions, but the majority were from the public/governmental (47.1%) sectors and tertiary institutions (62.2%). In terms of awareness of potential vaccine candidates reported in the literature, the majority (59.5%) reported knowing about at least one vaccine.

| Table 1: Respondents' Sociodemographic and Professional Characteristics (N=1512) |              |
|----------------------------------------------------------------------------------|--------------|
| Characteristic                                                                   | N (%)        |
| Sex                                                                              |              |
| Male                                                                             | 568 (37.6)   |
| Female                                                                           | 944 (62.4)   |
| Age (years), mean (SD)                                                           | 37.28 (8.99) |
| 21-30                                                                            | 385 (25.5)   |
| 31-40                                                                            | 677 (44.8)   |
| 41-50                                                                            | 298 (19.7)   |
| ≥50                                                                              | 152 (10.1)   |
| Marital status                                                                   |              |
| Single                                                                           | 435 (28.8)   |
| Married, living with family                                                      | 715 (47.3)   |
| Married, living alone                                                            | 322 (21.3)   |

|                                                                |             |
|----------------------------------------------------------------|-------------|
| Widowed or divorced                                            | 40 (2.6)    |
| Any chronic illness                                            |             |
| No                                                             | 1152 (76.2) |
| Yes                                                            | 360 (23.8)  |
| Clinical role                                                  |             |
| Physician                                                      | 637 (42.1)  |
| Nurse                                                          | 757 (50.1)  |
| Other healthcare provider *                                    | 118 (7.8)   |
| Working area                                                   |             |
| Intensive care unit: adults and<br>pediatrics                  | 331 (21.9)  |
| Emergency department                                           | 152 (10.1)  |
| General ward                                                   | 406 (26.9)  |
| Isolation ward                                                 | 57 (3.8)    |
| Outpatient area                                                | 319 (21.1)  |
| Other specialized units: dialysis, lab,<br>pharmacy, radiology | 206 (13.6)  |
| Hospital administrative                                        | 41 (2.7)    |
| Hospital category                                              |             |
| Private                                                        | 350 (23.1)  |
| Governmental                                                   | 712 (47.1)  |
| University hospital                                            | 450 (29.8)  |
| Hospital level of care                                         |             |
| Primary healthcare center                                      | 210 (13.9)  |
| Secondary-care hospital                                        | 361 (23.9)  |
| Tertiary hospital                                              | 941 (62.2)  |

*SD: Standard Deviation*

\* other healthcare provider include Technicians, Respiratory Therapists and Pharmacists

1  
2  
3  
4  
5  
6  
7  
8  
9  
10  
11  
12  
13  
14  
15  
16  
17  
18  
19  
20  
21  
22  
23  
24  
25  
26  
27  
28  
29  
30  
31  
32  
33  
34  
35  
36  
37  
38  
39  
40  
41  
42  
43  
44  
45  
46  
47  
48  
49  
50  
51  
52  
53  
54  
55  
56  
57  
58  
59  
60

For peer review only

The ChAdOx1 nCoV-19 vaccine was the vaccine recognized the most by HCWs (39.3%), followed by the Gam-COVID-Vac vaccine (31.9%) and the RNA BNT162b2 vaccine (30.8%). The least well-known vaccine among HCWs was the mRNA-1273 vaccine (19.9%; Table 2).

HCWs were asked to indicate their readiness to receive each type of COVID-19 vaccine with response categories of “never, maybe, or sure” (i.e., willing to receive). The respondents reported “maybe” in (65.1%) for the (AstraZeneca) vaccine and up to (75.5%) for the (Moderna), while they were “sure” to receive the vaccine if it was (CanSino) in (9.3%) but up to (24.4)% if the (AstraZeneca) one, on the other hand they answered “never receive” for the (Johnson and Johnson) or (Pfizer) vaccines in (10.2%) but up to (18.3) for the (CanSino) (Table 2).

| Vaccine Candidate                                                                                                                          | No. (%) Knows About Vaccine* | No. (%) willingness to Take the Vaccine |             |            |
|--------------------------------------------------------------------------------------------------------------------------------------------|------------------------------|-----------------------------------------|-------------|------------|
|                                                                                                                                            |                              | Never                                   | Maybe       | Sure       |
| AstraZeneca (Oxford University: British/Swedish) non-replicating viral vector (chimpanzee adenovirus vectored vaccine (ChAdOx1 nCoV-19)    | 594 (39.3)                   | 159 (10.5)                              | 984 (65.1)  | 369 (24.4) |
| Gamaleya (Russia)-Sputnik V non-replicating viral vector adenovirus (Gam-COVID-Vac)                                                        | 482 (31.9)                   | 271 (17.9)                              | 1100 (72.8) | 141 (9.3)  |
| Pfizer RNA (BNT162b2; USA): nucleoside-modified messenger RNA (modRNA)                                                                     | 466 (30.8)                   | 154 (10.2)                              | 1042 (68.9) | 316 (20.9) |
| Johnson and Johnson (USA; adenovirus type 26 vector; Ad26.COVS-2S)                                                                         | 422 (27.9)                   | 154 (10.2)                              | 1108 (73.3) | 250 (16.5) |
| CanSino (China; adenovirus type 5; Ad5-vectored)                                                                                           | 397 (26.3)                   | 277 (18.3)                              | 1103 (72.3) | 132 (8.7)  |
| Novavax (USA) protein subunit (full-length recombinant SARS CoV-2 glycoprotein nanoparticle vaccine adjuvanted with Matrix M; NVX-CoV2373) | 364 (24.1)                   | 166 (11)                                | 1139 (75.3) | 208 (13.8) |

|                              |            |               |                |               |
|------------------------------|------------|---------------|----------------|---------------|
| Moderna RNA (USA; mRNA-1273) | 301 (19.9) | 170<br>(11.2) | 1142<br>(75.5) | 200<br>(13.2) |
|------------------------------|------------|---------------|----------------|---------------|

\*Percentage expressed of total sample (N=1512 healthcare workers).

In determining factors influencing differential readiness of HCWs to receive vaccine candidates, a multiple-response dichotomies analysis showed that respondents' perceptions of the vaccine candidate as being more efficient in preventing infection was the most influencing factor (33%) in their decisions, followed by their personal preferences (29%) and the vaccine's manufacturing country (28.6%). The least influential factors were media and social media coverage (12.3%) and trustworthiness (4.2%; Table 3).

|                                                                         | N (%)      |
|-------------------------------------------------------------------------|------------|
| This COVID vaccine(s) seems more efficient in preventing the infection. | 499 (33)   |
| Personal preference                                                     | 439 (29)   |
| Manufacturing country                                                   | 433 (28.6) |
| Possibly fewer adverse effects from this vaccine                        | 417 (27.6) |
| Vaccine availability                                                    | 394 (26.1) |
| Company's reputation                                                    | 395 (26.1) |
| Media coverage                                                          | 186 (12.3) |
| Trustworthiness                                                         | 64 (4.2)   |

The HCW's sources of information about COVID-19 vaccines are shown in Table 4. The WHO website was the most utilized source for information (51.1%), followed by social media networks (48.3%), the Saudi Ministry of Health (MOH) website (43.8%), and official press releases (38.3%). The Centers for Disease Control and Prevention website was utilized by only one third of participants (Table 4).

|                                                                                  | N.(%)      |
|----------------------------------------------------------------------------------|------------|
| WHO website                                                                      | 762 (51.1) |
| Social networks (e.g., YouTube, Facebook, Twitter, WhatsApp)                     | 719 (48.3) |
| MOH website                                                                      | 652 (43.8) |
| Official statements or press releases from MOH (e.g., through SMS or newspapers) | 570 (38.3) |
| Hospital announcements (e.g., roll-ups or newsletters)                           | 543 (36.4) |
| Other internet resources                                                         | 537 (36.0) |
| CDC website                                                                      | 501 (33.6) |

WHO: World Health Organization, MOH: Ministry of Health, SMS: Short Message Service,  
 CDC: Centers for Disease Control and Prevention



A substantial number of HCWs in this study (n=612, 40.5%) reported unawareness of some vaccine candidates reported in scientific literature as of the time of the study. Therefore, as a secondary analysis, the generalized linear multivariate gamma regression analysis was used to explain the predictors of how likely the surveyed HCWs were to be aware of the different scientifically reported vaccine candidates. These results are presented in Table 5 and show that women knew significantly less than men about the different vaccine candidates (p=0.016). Older age correlated significantly and positively with more knowledge (p=0.027). Also, physicians knew significantly more about vaccine candidates than other HCWs did (p=0.001), and the HCWs from primary and secondary health centers knew of significantly fewer COVID-19 vaccine candidates than did HCWs from tertiary medical centers (p=0.002 for primary, p=0.02 for secondary). The participant's belief in the ability of COVID-19 vaccines to stop the pandemic predicted significantly higher knowledge of the available vaccine candidates (p=0.009). HCWs who did not interact with COVID-19–infected family members knew significantly less about the available vaccine candidates (p=0.018). Other specific worry/anxiety levels and beliefs were assessed, as reported in Table 5.

| Parameter                       | Exponentiated ( $\beta$ ) Coefficient | 95% CI for Exponentiated ( $\beta$ ) |       | p-value |
|---------------------------------|---------------------------------------|--------------------------------------|-------|---------|
|                                 |                                       | Lower                                | Upper |         |
| (Intercept)                     | 1.936                                 | 1.442                                | 2.600 | <0.001  |
| Sex=female                      | 0.900                                 | 0.826                                | 0.981 | 0.016   |
| Age (years)                     | 1.005                                 | 1.001                                | 1.009 | 0.027   |
| Clinical role=physician         | 1.267                                 | 1.101                                | 1.458 | 0.001   |
| Clinical role=nurse and Midwife | 0.855                                 | 0.747                                | 0.979 | 0.023   |
| Hospital setup type=primary     | 0.847                                 | 0.763                                | 0.940 | 0.002   |

|                                                                                                                                                    |       |       |       |       |
|----------------------------------------------------------------------------------------------------------------------------------------------------|-------|-------|-------|-------|
| Hospital setup type=secondary                                                                                                                      | 0.904 | 0.830 | 0.984 | 0.020 |
| Hospital sector=private                                                                                                                            | 0.910 | 0.825 | 1.003 | 0.057 |
| Hospital sector=Governmental                                                                                                                       | 0.961 | 0.884 | 1.045 | 0.355 |
| Generalized anxiety, mean score                                                                                                                    | 1.002 | 0.995 | 1.010 | 0.565 |
| Worry level from getting COVID-19 viral infection, mean score                                                                                      | 0.961 | 0.920 | 1.005 | 0.080 |
| Worry level from transmitting COVID-19 viral infection to family, mean score                                                                       | 1.029 | 0.991 | 1.069 | 0.133 |
| Believes the vaccine can stop the disease spread                                                                                                   | 1.073 | 1.018 | 1.132 | 0.009 |
| Believes vaccination prevents COVID-19 complications                                                                                               | 1.046 | 0.994 | 1.100 | 0.087 |
| Does not interact with COVID-19-infected family members                                                                                            | 0.907 | 0.836 | 0.983 | 0.018 |
| NOTE: Dependent variable was the total number of vaccines the HCW knew about. The exponentiated ( $\beta$ ) coefficient was interpreted as a rate. |       |       |       |       |

1  
2  
3 Our analysis (Fig 1) showed a significantly higher percentage rate of HCW readiness to  
4 receive any COVID-19 vaccine relative to the refusal rate after the Pfizer announcement  
5 compared to before it ( $\chi^2[1]4.56, p=0.032$ ). In addition, the percentage of HCWs accepting to  
6 take the BNT162b2 vaccine increased from 18% to 25.1% and proportion of those who stated  
7 they will never take the BNT162b2 vaccine dropped from 12% to 8.1% following Pfizer's  
8 announcement (Fig 2).  
9  
10  
11  
12  
13  
14  
15

## 16 **DISCUSSION**

17  
18 Since the beginning of the pandemic, an unprecedented global effort to develop a vaccine has  
19 been underway; research and development of different technologies have been applied for  
20 different vaccine candidates. The effort resulted in several types of vaccine candidates developed  
21 with various technologies, including adenovirus and RNA-based vaccines, all of which are novel  
22 and have not been developed for wide clinical use in other infectious diseases. Gaining  
23 knowledge of such new vaccines, with the rapid evolution of the development process, may be  
24 challenging: only 40% of study participants were aware of the ChAdOx1 nCoV-19 vaccine,<sup>5-9, 11,</sup>  
25  
26  
27  
28  
29  
30  
31  
32  
33  
34  
35  
36  
37  
38  
39  
40  
41  
42  
43  
44  
45  
46  
47  
48  
49  
50  
51  
52  
53  
54  
55  
56  
57  
58  
59  
60  
61  
62  
63  
64  
65  
66  
67  
68  
69  
70  
71  
72  
73  
74  
75  
76  
77  
78  
79  
80  
81  
82  
83  
84  
85  
86  
87  
88  
89  
90  
91  
92  
93  
94  
95  
96  
97  
98  
99  
100  
101  
102  
103  
104  
105  
106  
107  
108  
109  
110  
111  
112  
113  
114  
115  
116  
117  
118  
119  
120  
121  
122  
123  
124  
125  
126  
127  
128  
129  
130  
131  
132  
133  
134  
135  
136  
137  
138  
139  
140  
141  
142  
143  
144  
145  
146  
147  
148  
149  
150  
151  
152  
153  
154  
155  
156  
157  
158  
159  
160  
161  
162  
163  
164  
165  
166  
167  
168  
169  
170  
171  
172  
173  
174  
175  
176  
177  
178  
179  
180  
181  
182  
183  
184  
185  
186  
187  
188  
189  
190  
191  
192  
193  
194  
195  
196  
197  
198  
199  
200  
201  
202  
203  
204  
205  
206  
207  
208  
209  
210  
211  
212  
213  
214  
215  
216  
217  
218  
219  
220  
221  
222  
223  
224  
225  
226  
227  
228  
229  
230  
231  
232  
233  
234  
235  
236  
237  
238  
239  
240  
241  
242  
243  
244  
245  
246  
247  
248  
249  
250  
251  
252  
253  
254  
255  
256  
257  
258  
259  
260  
261  
262  
263  
264  
265  
266  
267  
268  
269  
270  
271  
272  
273  
274  
275  
276  
277  
278  
279  
280  
281  
282  
283  
284  
285  
286  
287  
288  
289  
290  
291  
292  
293  
294  
295  
296  
297  
298  
299  
300  
301  
302  
303  
304  
305  
306  
307  
308  
309  
310  
311  
312  
313  
314  
315  
316  
317  
318  
319  
320  
321  
322  
323  
324  
325  
326  
327  
328  
329  
330  
331  
332  
333  
334  
335  
336  
337  
338  
339  
340  
341  
342  
343  
344  
345  
346  
347  
348  
349  
350  
351  
352  
353  
354  
355  
356  
357  
358  
359  
360  
361  
362  
363  
364  
365  
366  
367  
368  
369  
370  
371  
372  
373  
374  
375  
376  
377  
378  
379  
380  
381  
382  
383  
384  
385  
386  
387  
388  
389  
390  
391  
392  
393  
394  
395  
396  
397  
398  
399  
400  
401  
402  
403  
404  
405  
406  
407  
408  
409  
410  
411  
412  
413  
414  
415  
416  
417  
418  
419  
420  
421  
422  
423  
424  
425  
426  
427  
428  
429  
430  
431  
432  
433  
434  
435  
436  
437  
438  
439  
440  
441  
442  
443  
444  
445  
446  
447  
448  
449  
450  
451  
452  
453  
454  
455  
456  
457  
458  
459  
460  
461  
462  
463  
464  
465  
466  
467  
468  
469  
470  
471  
472  
473  
474  
475  
476  
477  
478  
479  
480  
481  
482  
483  
484  
485  
486  
487  
488  
489  
490  
491  
492  
493  
494  
495  
496  
497  
498  
499  
500  
501  
502  
503  
504  
505  
506  
507  
508  
509  
510  
511  
512  
513  
514  
515  
516  
517  
518  
519  
520  
521  
522  
523  
524  
525  
526  
527  
528  
529  
530  
531  
532  
533  
534  
535  
536  
537  
538  
539  
540  
541  
542  
543  
544  
545  
546  
547  
548  
549  
550  
551  
552  
553  
554  
555  
556  
557  
558  
559  
560  
561  
562  
563  
564  
565  
566  
567  
568  
569  
570  
571  
572  
573  
574  
575  
576  
577  
578  
579  
580  
581  
582  
583  
584  
585  
586  
587  
588  
589  
590  
591  
592  
593  
594  
595  
596  
597  
598  
599  
600  
601  
602  
603  
604  
605  
606  
607  
608  
609  
610  
611  
612  
613  
614  
615  
616  
617  
618  
619  
620  
621  
622  
623  
624  
625  
626  
627  
628  
629  
630  
631  
632  
633  
634  
635  
636  
637  
638  
639  
640  
641  
642  
643  
644  
645  
646  
647  
648  
649  
650  
651  
652  
653  
654  
655  
656  
657  
658  
659  
660  
661  
662  
663  
664  
665  
666  
667  
668  
669  
670  
671  
672  
673  
674  
675  
676  
677  
678  
679  
680  
681  
682  
683  
684  
685  
686  
687  
688  
689  
690  
691  
692  
693  
694  
695  
696  
697  
698  
699  
700  
701  
702  
703  
704  
705  
706  
707  
708  
709  
710  
711  
712  
713  
714  
715  
716  
717  
718  
719  
720  
721  
722  
723  
724  
725  
726  
727  
728  
729  
730  
731  
732  
733  
734  
735  
736  
737  
738  
739  
740  
741  
742  
743  
744  
745  
746  
747  
748  
749  
750  
751  
752  
753  
754  
755  
756  
757  
758  
759  
760  
761  
762  
763  
764  
765  
766  
767  
768  
769  
770  
771  
772  
773  
774  
775  
776  
777  
778  
779  
780  
781  
782  
783  
784  
785  
786  
787  
788  
789  
790  
791  
792  
793  
794  
795  
796  
797  
798  
799  
800  
801  
802  
803  
804  
805  
806  
807  
808  
809  
810  
811  
812  
813  
814  
815  
816  
817  
818  
819  
820  
821  
822  
823  
824  
825  
826  
827  
828  
829  
830  
831  
832  
833  
834  
835  
836  
837  
838  
839  
840  
841  
842  
843  
844  
845  
846  
847  
848  
849  
850  
851  
852  
853  
854  
855  
856  
857  
858  
859  
860  
861  
862  
863  
864  
865  
866  
867  
868  
869  
870  
871  
872  
873  
874  
875  
876  
877  
878  
879  
880  
881  
882  
883  
884  
885  
886  
887  
888  
889  
890  
891  
892  
893  
894  
895  
896  
897  
898  
899  
900  
901  
902  
903  
904  
905  
906  
907  
908  
909  
910  
911  
912  
913  
914  
915  
916  
917  
918  
919  
920  
921  
922  
923  
924  
925  
926  
927  
928  
929  
930  
931  
932  
933  
934  
935  
936  
937  
938  
939  
940  
941  
942  
943  
944  
945  
946  
947  
948  
949  
950  
951  
952  
953  
954  
955  
956  
957  
958  
959  
960  
961  
962  
963  
964  
965  
966  
967  
968  
969  
970  
971  
972  
973  
974  
975  
976  
977  
978  
979  
980  
981  
982  
983  
984  
985  
986  
987  
988  
989  
990  
991  
992  
993  
994  
995  
996  
997  
998  
999  
1000

1  
2  
3 vaccine.<sup>36</sup> During the H1N1 pandemic, 50 of 161 healthcare workers (31.1%) were willing to  
4 take the 2009 H1N1 vaccine<sup>37</sup>. In a cross-sectional survey conducted in Riyadh in 2019 on  
5 influenza vaccine uptake, results showed an acceptance rate of 71% with hesitancy attributed to  
6 concerns on adverse events in 50% of participants<sup>38</sup>. It was also noted that people in the Middle  
7 East generally have low acceptance rate of COVID-19 vaccines and such acceptance was 23-  
8 66%<sup>29, 39, 40</sup>. However, no such acceptance rate has been evaluated among HCWs.<sup>41</sup>  
9  
10  
11  
12  
13  
14  
15

16 It is interesting to note that, of all the HCW respondents asked about taking a COVID-19  
17 vaccine, only 20% or 24% preferred to receive the AstraZeneca or the Pfizer vaccine,  
18 respectively. This low response to acceptance of any vaccine in development may indicate  
19 variability in the knowledge and understanding about the different vaccines. Vaccine knowledge  
20 is an area that needs more study to understand variables contributing to acceptance or rejection  
21 of each type of vaccine according to different development platforms used. This understanding  
22 would aid policymakers in the development of appropriate educational materials to boost  
23 confidence in various vaccine platforms.  
24  
25  
26  
27  
28  
29  
30  
31

32 Many factors affect the choice to receive vaccines. In this study, the top reason for  
33 choosing a vaccine was that the vaccine seems more effective at preventing infection (33%). A  
34 previous study found that 50% vaccine efficacy was associated with a 51% rate of acceptance<sup>42</sup>  
35  
36  
37

38 The manufacturing country was another reason given for accepting the vaccine (in 28.6%  
39 of respondents). This finding is similar to results from a US survey related to hypothetical  
40 vaccines. The surveyed individuals had lower acceptance of the vaccine if it originated from a  
41 country outside the United States.<sup>42</sup> Other contributing factors, such as fewer adverse effects,  
42 were also reported in this study.<sup>42</sup> Understanding these factors is important to build strategies for  
43 vaccine acceptance in any community. Strategies should address concerns, contributing factors,  
44 and misconceptions.<sup>43</sup> Trustworthiness was indicated by approximately 4% of the respondents as  
45 a factor in accepting a COVID-19 vaccine. This is quite different when compared to the general  
46 population in the United States, in which trust, and perceptions of local COVID-19 vaccination  
47 norms were the strongest predictors of COVID-19 vaccine acceptance<sup>44</sup>. The difference might  
48 be the fact that our study included only HCWs who may have better understanding of the disease  
49  
50  
51  
52  
53  
54  
55  
56  
57  
58  
59  
60

1  
2  
3 and the vaccination. It is important to note that trust is an important modifiable element of any  
4 successful vaccine campaign. Trustworthiness was strongly associated with acceptance of a  
5 COVID-19 vaccine,<sup>45</sup> and this factor was also related to acceptance of other vaccines, such as  
6 H1N1, SARS, and MERS-CoV vaccines.<sup>25</sup>  
7  
8  
9

10  
11  
12  
13 The most-reported sources of information for HCWs were the WHO website and social  
14 networks (as expected in a pandemic). Previously, Alsubaie et al.<sup>46</sup> reported results from the  
15 same HCWs' population, which showed that hospital announcements and MOH official  
16 statements were more commonly sought for information about the MERS-CoV national  
17 outbreak. In the case of the general public, the source of knowledge and information about  
18 COVID-19 was official government social media and Twitter<sup>47</sup>. And another study showed  
19 85.8% of the public in Saudi Arabia used the internet and social media for information regarding  
20 COVID-19. In a study from the US, 45-66% of HCWs used social media as a source of  
21 information<sup>48,49</sup>. These findings suggest that HCWs in Saudi Arabia use social networking sites  
22 differently than their US counterparts, which is important for other studies that look at social  
23 media and knowledge. Seeking knowledge from reliable sources about the pandemic and  
24 vaccinations could significantly impact the HCWs' perceptions of vaccine acceptance<sup>50</sup>.  
25 Misinformation about the COVID-19 vaccine was associated with decreased vaccination  
26 acceptance among those who would otherwise definitely vaccinate.<sup>51</sup>  
27  
28  
29  
30  
31  
32  
33  
34  
35  
36  
37  
38  
39

40 It is interesting to note the differences in knowledge about vaccines by level of training.  
41 Physicians knew significantly more about vaccine candidates than other HCWs did ( $p=0.001$ )  
42 (Table 5). Similarly, in a study from the USA, general COVID-19 knowledge among physicians  
43 was higher than other HCW, but non-physicians who work in healthcare did not have greater  
44 knowledge than public<sup>49</sup>. Noteworthy, HCWs working in tertiary and academic centers were  
45 more knowledgeable about various vaccine candidates compared with HCWs working in  
46 primary and secondary centers. This result may be explained by more scientific activity and  
47 educational campaigns typically associated with teaching hospitals. This increased knowledge  
48 was especially common among physicians in our study, like other studies; in a cross-sectional  
49 survey conducted in Italy among HCWs to assess their knowledge, attitudes, and practices about  
50  
51  
52  
53  
54  
55  
56  
57  
58  
59  
60

1  
2  
3 vaccinations, physicians and those who had received information about vaccinations from  
4 scientific journals, educational activities, or professional associations were more likely to have  
5 adequate knowledge.<sup>52</sup> The knowledge differences identified between centers and types of  
6 providers highlight the importance of academic activities and keeping up-to-date with the  
7 scientific literature during the COVID-19 pandemic.  
8  
9  
10  
11  
12  
13

14 Remarkably, after the Pfizer and BioNTech announcement about the efficacy rate of  
15 BNT162b2, the HCWs in our study demonstrated significantly more willingness to undergo  
16 vaccination.<sup>32</sup> This change was despite simultaneous negative news on some COVID-19  
17 vaccination trials, such as the halting of clinical studies with the CoronaVac vaccine by the  
18 Brazilian national sanitary regulator (Anvisa) due to a serious adverse event.<sup>53</sup> Vaccine  
19 acceptance is a multifactorial issue, but having positive COVID-19 vaccine trial results  
20 circulating in the news and social media for several days after the press release on the efficacy of  
21 BNT162b2 could improve the HCWs' willingness to vaccinate.  
22  
23  
24  
25  
26  
27  
28  
29

30 This study has the limitation of being self-reported and survey-based, so future  
31 observational studies on the HCWs actual acceptance of various COVID-19 vaccines is  
32 warranted. As a cross-sectional survey promoted on social media, it is not possible to calculate a  
33 response rate, and results may not be generalizable over time, therefore, further research is  
34 warranted. Another aspect is the national design, that needs further research for external validity  
35 in other countries.  
36  
37  
38  
39  
40  
41  
42

## 43 **CONCLUSION**

44 HCW awareness of the several COVID-19 candidate vaccines could improve perception and  
45 acceptance of vaccination. Reliable sources on vaccine efficiency could improve vaccine uptake,  
46 and healthcare authorities should utilize these sources to decrease vaccine hesitancy among  
47 frontline healthcare providers.  
48  
49  
50  
51  
52  
53  
54  
55  
56  
57  
58  
59  
60

## Refs:

1. World Health Organization. Coronavirus disease 2019 (COVID-19) Situation Report – 71. Accessed April 27, 2020. <https://www.who.int/docs/default-source/coronaviruse/situation-reports/20200331-sitrep-71-covid-19.pdf>
2. The State Council the People's Republic of China. COVID-19 sends most G20 members into negative GDP growth, except China. Accessed 15 Dec 2020, [http://english.www.gov.cn/news/topnews/202009/05/content\\_WS5f5398c8c6d0f7257693b957.html](http://english.www.gov.cn/news/topnews/202009/05/content_WS5f5398c8c6d0f7257693b957.html)
3. Carvalho Aguiar Melo M, de Sousa Soares D. Impact of social distancing on mental health during the COVID-19 pandemic: An urgent discussion. *Int J Soc Psychiatry*. 2020:625-626. vol. 6.
4. WHO. Draft landscape of COVID-19 candidate vaccines. Accessed 19 Dec 2020, <https://www.who.int/publications/m/item/draft-landscape-of-covid-19-candidate-vaccines>
5. A Study of Ad26.COV2.S for the Prevention of SARS-CoV-2-Mediated COVID-19 in Adult Participants (ENSEMBLE). Accessed 2 Dec 2020, <https://clinicaltrials.gov/ct2/show/NCT04505722>
6. Mullard A. COVID-19 vaccine development pipeline gears up. *Lancet*. Jun 6 2020;395(10239):1751-1752. doi:10.1016/s0140-6736(20)31252-6
7. Anderson EJ, Roupael NG, Widge AT, et al. Safety and Immunogenicity of SARS-CoV-2 mRNA-1273 Vaccine in Older Adults. *N Engl J Med*. Sep 29 2020;doi:10.1056/NEJMoa2028436
8. Folegatti PM, Ewer KJ, Aley PK, et al. Safety and immunogenicity of the ChAdOx1 nCoV-19 vaccine against SARS-CoV-2: a preliminary report of a phase 1/2, single-blind, randomised controlled trial. *Lancet*. Aug 15 2020;396(10249):467-478. doi:10.1016/s0140-6736(20)31604-4
9. Walsh EE, Frenck RW, Jr., Falsey AR, et al. Safety and Immunogenicity of Two RNA-Based Covid-19 Vaccine Candidates. *N Engl J Med*. Oct 14 2020;doi:10.1056/NEJMoa2027906
10. Keech C, Albert G, Cho I, et al. Phase 1-2 Trial of a SARS-CoV-2 Recombinant Spike Protein Nanoparticle Vaccine. *N Engl J Med*. Sep 2 2020;doi:10.1056/NEJMoa2026920
11. Zhu FC, Guan XH, Li YH, et al. Immunogenicity and safety of a recombinant adenovirus type-5-vectored COVID-19 vaccine in healthy adults aged 18 years or older: a randomised, double-blind, placebo-controlled, phase 2 trial. *Lancet*. Aug 15 2020;396(10249):479-488. doi:10.1016/s0140-6736(20)31605-6
12. Bar-Zeev N, Moss WJ. Encouraging results from phase 1/2 COVID-19 vaccine trials. *Lancet*. Aug 15 2020;396(10249):448-449. doi:10.1016/s0140-6736(20)31611-1
13. Zhu FC, Li YH, Guan XH, et al. Safety, tolerability, and immunogenicity of a recombinant adenovirus type-5 vectored COVID-19 vaccine: a dose-escalation, open-label, non-randomised, first-in-human trial. *Lancet*. Jun 13 2020;395(10240):1845-1854. doi:10.1016/s0140-6736(20)31208-3
14. Gao Q, Bao L, Mao H, et al. Development of an inactivated vaccine candidate for SARS-CoV-2. *Science*. Jul 3 2020;369(6499):77-81. doi:10.1126/science.abc1932
15. NIH. National Institute of Health. *Promising Interim Results from Clinical Trial of NIH-Moderna COVID-19 Vaccine*. . Accessed 15 Dec 2020, <https://www.nih.gov/news-events/news-releases/promising-interim-results-clinical-trial-nih-moderna-covid-19-vaccine>
16. Kwok KO, Lai F, Wei WI, Wong SYS, Tang JWT. Herd immunity - estimating the level required to halt the COVID-19 epidemics in affected countries. *J Infect*. Jun 2020;80(6):e32-e33. doi:10.1016/j.jinf.2020.03.027



17. Feleszko W, Lewulis P, Czarnecki A, Waszkiewicz P. Flattening the curve of COVID-19 vaccine rejection—A global overview. *Available at SSRN*. 2020;
18. Bartsch SM, O'Shea KJ, Ferguson MC, et al. Vaccine Efficacy Needed for a COVID-19 Coronavirus Vaccine to Prevent or Stop an Epidemic as the Sole Intervention. *Am J Prev Med*. Oct 2020;59(4):493-503. doi:10.1016/j.amepre.2020.06.011
19. Grech V, Gauci C, Agius S. Vaccine hesitancy among Maltese healthcare workers toward influenza and novel COVID-19 vaccination. *Early Hum Dev*. Oct 1 2020:105213. doi:10.1016/j.earlhumdev.2020.105213
20. Palamenghi L, Barello S, Boccia S, Graffigna G. Mistrust in biomedical research and vaccine hesitancy: the forefront challenge in the battle against COVID-19 in Italy. *Eur J Epidemiol*. Aug 2020;35(8):785-788. doi:10.1007/s10654-020-00675-8
21. Wong LP, Alias H, Wong PF, Lee HY, AbuBakar S. The use of the health belief model to assess predictors of intent to receive the COVID-19 vaccine and willingness to pay. *Hum Vaccin Immunother*. Sep 1 2020;16(9):2204-2214. doi:10.1080/21645515.2020.1790279
22. Detoc M, Bruel S, Frappe P, Tardy B, Botelho-Nevers E, Gagneux-Brunon A. Intention to participate in a COVID-19 vaccine clinical trial and to get vaccinated against COVID-19 in France during the pandemic. *Vaccine*. Oct 21 2020;38(45):7002-7006. doi:10.1016/j.vaccine.2020.09.041
23. Dror AA, Eisenbach N, Taiber S, et al. Vaccine hesitancy: the next challenge in the fight against COVID-19. *Eur J Epidemiol*. 2020:775-779. vol. 8.
24. Wang K, Wong ELY, Ho KF, et al. Intention of nurses to accept coronavirus disease 2019 vaccination and change of intention to accept seasonal influenza vaccination during the coronavirus disease 2019 pandemic: A cross-sectional survey. *Vaccine*. Oct 21 2020;38(45):7049-7056. doi:10.1016/j.vaccine.2020.09.021
25. Siegrist M, Zingg A. The role of public trust during pandemics: Implications for crisis communication. *European psychologist*. 2014;19(1):23.
26. Freed GL, Clark SJ, Butchart AT, Singer DC, Davis MM. Sources and perceived credibility of vaccine-safety information for parents. *Pediatrics*. May 2011;127 Suppl 1:S107-12. doi:10.1542/peds.2010-1722P
27. Hopkins J M, U. *Coronavirus resource center. COVID-19 Map 2020* . Accessed 19 Dec 2020, <https://coronavirus.jhu.edu/map.html>
28. Barry M, Temsah M-H, Alhuzaimi A, et al. COVID-19 vaccine confidence and hesitancy among healthcare workers: a cross-sectional survey from a MERS-CoV experienced nation. *medRxiv*. 2020:2020.12.09.20246447. doi:10.1101/2020.12.09.20246447
29. Al-Mohaithef M, Padhi BK. Determinants of COVID-19 Vaccine Acceptance in Saudi Arabia: A Web-Based National Survey. *Journal of Multidisciplinary Healthcare*. 2020;13:1657-1663.
30. Regmi PR, Waithaka E, Paudyal A, Simkhada P, Van Teijlingen E. Guide to the design and application of online questionnaire surveys. *Nepal journal of epidemiology*. 2016;6(4):640.
31. Temsah MH, Alhuzaimi AN, Alamro N, et al. Knowledge, Attitudes, and Practices of Healthcare Workers During the Early COVID-19 Pandemic in a Main, Academic Tertiary Care Centre in Saudi Arabia. *Epidemiol Infect*. Aug 28 2020:1-29. doi:10.1017/S0950268820001958
32. PFIZER AND BIONTECH ANNOUNCE VACCINE CANDIDATE AGAINST COVID-19 ACHIEVED SUCCESS IN FIRST INTERIM ANALYSIS FROM PHASE 3 STUDY. Accessed 16 Dec 2020, <https://www.pfizer.com/news/press-release/press-release-detail/pfizer-and-biontech-announce-vaccine-candidate-against>
33. IBM Corp. Released 2012. IBM SPSS Statistics for Windows, Version 21.0. Armonk, NY: IBM Corp.



- 1  
2  
3 34. Schwartz JL. Evaluating and Deploying Covid-19 Vaccines - The Importance of Transparency,  
4 Scientific Integrity, and Public Trust. *N Engl J Med*. Oct 29 2020;383(18):1703-1705.  
5 doi:10.1056/NEJMp2026393  
6  
7 35. Bedford J, Enria D, Giesecke J, et al. COVID-19: towards controlling of a pandemic. *Lancet*. Mar  
8 28 2020;395(10229):1015-1018. doi:10.1016/s0140-6736(20)30673-5  
9  
10 36. Lazarus JV, Ratzan SC, Palayew A, et al. A global survey of potential acceptance of a COVID-19  
11 vaccine. *Nat Med*. Oct 20 2020:1-4. doi:10.1038/s41591-020-1124-9  
12  
13 37. Al-Tawfiq JA. Willingness of health care workers of various nationalities to accept H1N1 (2009)  
14 pandemic influenza A vaccination. *Ann Saudi Med*. Jan-Feb 2012;32(1):64-7. doi:10.5144/0256-  
15 4947.2012.64  
16  
17 38. Barry MA, Aljammaz KI, Alrashed AA. Knowledge, Attitude, and Barriers Influencing Seasonal  
18 Influenza Vaccination Uptake. *Can J Infect Dis Med Microbiol*. 2020;2020:7653745.  
19 doi:10.1155/2020/7653745  
20  
21 39. Sallam M, Dababseh D, Eid H, et al. High Rates of COVID-19 Vaccine Hesitancy and Its  
22 Association with Conspiracy Beliefs: A Study in Jordan and Kuwait among Other Arab Countries. *Vaccines*  
23 (*Basel*). Jan 12 2021;9(1)doi:10.3390/vaccines9010042  
24  
25 40. Salali GD, Uysal MS. COVID-19 vaccine hesitancy is associated with beliefs on the origin of the  
26 novel coronavirus in the UK and Turkey. *Psychol Med*. Oct 19 2020:1-3.  
27 doi:10.1017/s0033291720004067  
28  
29 41. Marien AG, Hochart A, Lagrée M, Diallo D, Martinot A, Dubos F. Parental acceptance of an  
30 intranasal vaccine: Example of influenza vaccine. *Arch Pediatr*. Feb 2019;26(2):71-74.  
31 doi:10.1016/j.arcped.2018.11.002  
32  
33 42. Kreps S, Prasad S, Brownstein JS, et al. Factors Associated With US Adults' Likelihood of  
34 Accepting COVID-19 Vaccination. *JAMA Netw Open*. Oct 1 2020;3(10):e2025594.  
35 doi:10.1001/jamanetworkopen.2020.25594  
36  
37 43. Biasio LR. Vaccine hesitancy and health literacy. *Hum Vaccin Immunother*. 2017:701-702. vol. 3.  
38  
39 44. Lennon RP, Small ML, Smith RA, Van Scoy LJ, Myrick JG, Martin MA. Unique predictors of  
40 intended uptake of a COVID-19 vaccine. *medRxiv*. 2020:2020.12.11.20235838.  
41 doi:10.1101/2020.12.11.20235838  
42  
43 45. HOVLAND CI, WEISS W. The Influence of Source Credibility on Communication Effectiveness\*.  
44 *Public Opinion Quarterly*. 1951;15(4):635-650. doi:10.1086/266350  
45  
46 46. Alsubaie S, Hani Tamsah M, Al-Eyadhy AA, et al. Middle East Respiratory Syndrome Coronavirus  
47 epidemic impact on healthcare workers' risk perceptions, work and personal lives. *J Infect Dev Ctries*.  
48 Oct 31 2019;13(10):920-926. doi:10.3855/jidc.11753  
49  
50 47. Alnasser AHA, Al-Tawfiq JA, Al Kalif MSH, et al. The positive impact of social media on the level  
51 of COVID-19 awareness in Saudi Arabia: a web-based cross-sectional survey. *Infez Med*. Dec 1  
52 2020;28(4):545-550.  
53  
54 48. Alnasser AHA, Al-Tawfiq JA, Al-Kalif MSH, et al. Public Knowledge, Attitudes, and Practice  
55 towards COVID-19 Pandemic in Saudi Arabia: A Web-Based Cross-Sectional Survey. *Med Sci (Basel)*. Feb  
56 16 2021;9(1)doi:10.3390/medsci9010011  
57  
58 49. Sathianathan S, Van Scoy LJ, Sakya SM, et al. Knowledge, Perceptions, and Preferred Information  
59 Sources Related to COVID-19 Among Healthcare Workers: Results of a Cross Sectional Survey. *Am J*  
60 *Health Promot*. Dec 23 2020:890117120982416. doi:10.1177/0890117120982416  
61  
62 50. Tamsah M-H, Barry M, Aljamaan F, et al. SARS-CoV-2 B. 1.1. 7 lineage-related perceptions and  
63 travel worry among healthcare workers. *medRxiv*. 2021;  
64  
65 51. Loomba S, de Figueiredo A, Piatek S, de Graaf K, Larson HJ. Measuring the Impact of Exposure to  
66 COVID-19 Vaccine Misinformation on Vaccine Intent in the UK and US. *medRxiv*. 2020;

1  
2  
3 52. Pelullo CP, Della Polla G, Napolitano F, Di Giuseppe G, Angelillo IF. Healthcare Workers'  
4 Knowledge, Attitudes, and Practices about Vaccinations: A Cross-Sectional Study in Italy. *Vaccines*.  
5 2020;8(2):148.

6 53. Anvisa. Anvisa halts CoronaVac studies after "serious adverse event". 16 Dec 2020,  
7 [https://agenciabrasil.ebc.com.br/en/saude/noticia/2020-11/anvisa-halts-coronavac-studies-after-grave-](https://agenciabrasil.ebc.com.br/en/saude/noticia/2020-11/anvisa-halts-coronavac-studies-after-grave-adverse-event)  
8 [adverse-event](https://agenciabrasil.ebc.com.br/en/saude/noticia/2020-11/anvisa-halts-coronavac-studies-after-grave-adverse-event)  
9

10  
11  
12  
13 Figure 1: Readiness to take COVID-19 vaccines, as reported before and after the interim report  
14 of the efficacy rate of BNT162b2. \*p=0.032.

15  
16  
17 Figure 2: The percentage of healthcare workers (HCWs) willing to receive the BNT162b2  
18 vaccine after its efficacy announcement.  
19  
20  
21  
22  
23  
24  
25  
26  
27  
28  
29  
30  
31  
32  
33  
34  
35  
36  
37  
38  
39  
40  
41  
42  
43  
44  
45  
46  
47  
48  
49  
50  
51  
52  
53  
54  
55  
56  
57  
58  
59  
60

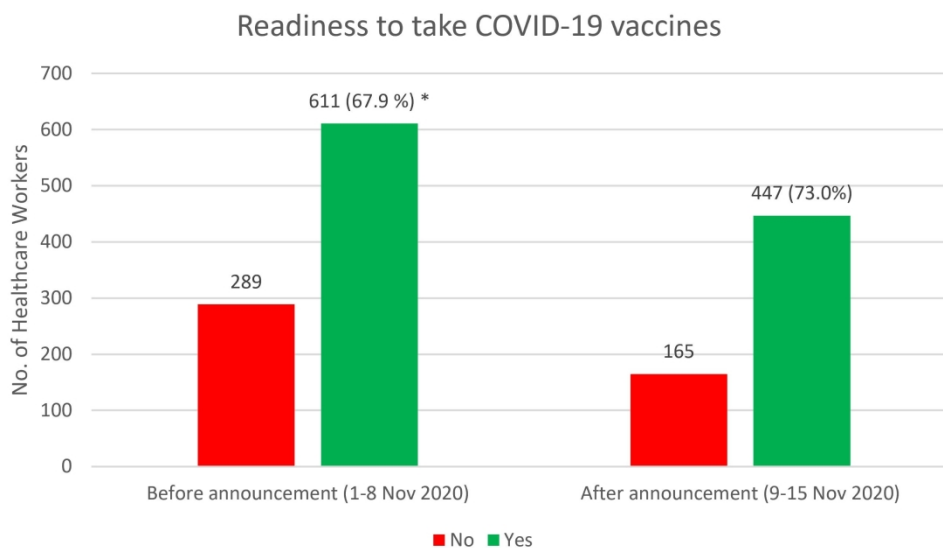

Readiness to take COVID-19 vaccines, as reported before and after the interim report of the efficacy rate of BNT162b2. \*p=0.032.

287x167mm (240 x 240 DPI)

1  
2  
3  
4  
5  
6  
7  
8  
9  
10  
11  
12  
13  
14  
15  
16  
17  
18  
19  
20  
21  
22  
23  
24  
25  
26  
27  
28  
29  
30  
31  
32  
33  
34  
35  
36  
37  
38  
39  
40  
41  
42  
43  
44  
45  
46  
47  
48  
49  
50  
51  
52  
53  
54  
55  
56  
57  
58  
59  
60

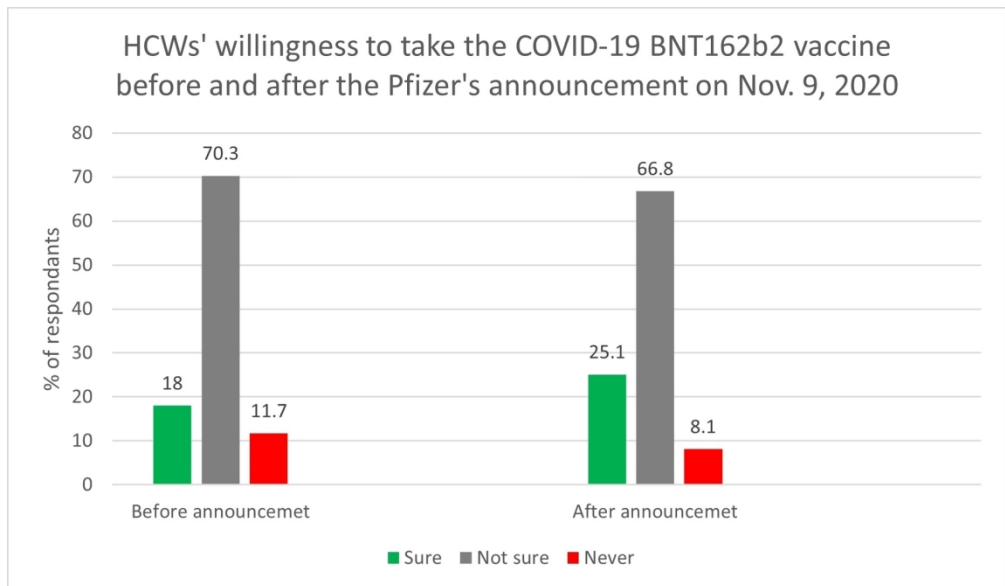

The percentage of healthcare workers (HCWs) willing to receive the BNT162b2 vaccine after its efficacy announcement.

152x88mm (300 x 300 DPI)

## COVID-19 Vaccination perceptions of HCWs

**\* 1. Greetings dear healthcare provider,**

We would like you to imagine a situation where a number of vaccines for COVID-19 have been developed. These vaccines have undergone all required testing and have received regulatory approval for use in humans from the health authorities in Saudi and in other countries. Vaccination has also been recommended by the World Health Organisation (WHO).

Kindly take 5 minutes to answer, keeping in mind that all your answers are confidential. This will also give you more insight into several COVID vaccines that are currently in Phase 3 trial.

The study was approved by the Institutional Review Board at the College of Medicine, King Saud University (approval # 20/0065/IRB).

Thank You!

Dr. Hani Temsah, Dr. Mazin Barry  
mtemsah@ksu.edu.sa

- I am a healthcare worker in Saudi Arabia, and I **ACCEPT** to participate in this Survey
- I do **NOT accept** to participate in this Survey

**\* 2. Region:**

- Riyadh region
- Makkah region
- Madinah region
- Qassim region
- Eastern Region
- Asir
- Tabuk
- Hail
- The Northern Border region
- Jazan
- Najran
- Al Baha
- Al Jouf

## COVID-19 Vaccination perceptions of HCWs

Please Choose Your Answers then Press "Next"

\* 3. You are

- Consultant
- Assistant consultant
- Resident
- Nurse
- RT
- Other (please specify)

\* 4. What is your age?

Age in years:

\* 5. What is your gender?

- Female
- Male

\* 6. Are you now married, widowed, divorced, separated, or have you never been married?

- Married and living with children
- Married but living alone
- Widowed
- Divorced
- Never married

1  
2  
3  
4  
5  
6  
7  
8  
9  
10  
11  
12  
13  
14  
15  
16  
17  
18  
19  
20  
21  
22  
23  
24  
25  
26  
27  
28  
29  
30  
31  
32  
33  
34  
35  
36  
37  
38  
39  
40  
41  
42  
43  
44  
45  
46  
47  
48  
49  
50  
51  
52  
53  
54  
55  
56  
57  
58  
59  
60

\* 7. At what Hospital area do you work usually most of the time?

- Pediatric ICU
- Adult ICU
- Pedia ER
- Adult ER
- Isolation ward
- General ward
- OPD
- Other (please specify)

8. Do you have a chronic medical condition?

(like Hypertension, DM, chronic kidney disease, Heart disease, Asthma, COPD, Cancer, Immunocompromised state, SCD, Obesity)

- No
- Yes (please specify)

\* 9. Your hospital setting and type of practice?

Hospital/healthcare center Type

Practice Level

Hospital Setting:

\* 10. Have you been previously in contact with Corona (proven or suspected COVID) patients?

(Please choose all that apply)

- Yes: With COVID-Infected Patient
- Yes: With COVID-positive family member or friend
- Yes: With MERS-CoV Patient
- No: No contact at all

\* 11. Have you been infected with laboratory-confirmed COVID-19 yourself?

- Yes
- No

## COVID-19 Vaccination perceptions of HCWs

1  
2  
3  
4  
5  
6  
7 \* 12. Did you take the influenza vaccine during the last 2 years?

8  Yes

9  
10  No

11  
12  
13 \* 13. If an approved MERS-CoV vaccine became available in Saudi Arabia this year, would you take it  
14 yourself?

15  
16  Yes

17  
18  No

19  
20  
21 \* 14. If an approved COVID vaccine became available in Saudi Arabia this year, would you take it yourself?

22  
23  Yes

24  
25  No

26  
27  
28 \* 15. If a COVID vaccine became available when you will take it?

29  
30  Get one as soon as possible

31  
32  Delay getting it for few months

33  
34  Never get one



## COVID-19 Vaccination perceptions of HCWs

16. You choose not to get the COVID Vaccine:

What are your reasons for not taking the vaccine?

(Choose what apply)

- Inadequate data about the safety of a new vaccine
- I am against vaccine in general ( or I avoid medications whenever possible)
- Vaccine administration is painful or inconvenient
- I already had COVID infection
- A concern of adverse effects of the vaccine
- A concern of acquiring Covid19 from the vaccine
- A concern of vaccine being ineffective
- Prior adverse reaction to the vaccine
- I perceive myself not at high risk to acquire Covid19 infection
- I perceive myself not at high risk to develop complications if I get infected with Covid19 infection
- Other (please specify)

## COVID-19 Vaccination perceptions of HCWs

## COVID Vaccine

\* 17. If a COVID vaccine is announced this year in 2020, would your first thoughts be:

- It is a scientific achievement to find a vaccine that fast
- It was probably rushed without enough testing
- Other (please specify)

\* 18. COVID vaccine is the most likely way to stop this pandemic.

- Strongly agree
- Agree
- Neither agree nor disagree
- Disagree
- Strongly disagree

\* 19. Once the vaccine is available and approved; it would be safe.

- Strongly agree
- Agree
- Neither agree nor disagree
- Disagree
- Strongly disagree

\* 20. The best way to avoid the complications of COVID is by being vaccinated

- Strongly agree
- Agree
- Neither agree nor disagree
- Disagree
- Strongly disagree

\* 21. From the following COVID vaccines in phase 3 trials, which do you know?

|                                                                                                                                                              | I do not know this vaccine | I know about this vaccine |
|--------------------------------------------------------------------------------------------------------------------------------------------------------------|----------------------------|---------------------------|
| AstraZeneca:<br>(OxfordUniversity:<br>British/Swedish)<br>Non-Replicating Viral<br>Vector (chimpanzee<br>adenovirus vectored<br>vaccine (ChAdOx1<br>nCoV-19) | <input type="radio"/>      | <input type="radio"/>     |
| Johnson and Johnson<br>(USA):<br>(adenovirus type 26<br>vector Ad26.COV2-S)                                                                                  | <input type="radio"/>      | <input type="radio"/>     |
| Pfizer RNA (BNT162b2<br>(USA):<br>nucleoside-modified<br>messenger RNA<br>modRNA)                                                                            | <input type="radio"/>      | <input type="radio"/>     |
| Novavax (USA):<br>protein subunit (Full<br>length recombinant<br>SARS CoV-2<br>glycoprotein<br>nanoparticle vaccine<br>adjuvanted with Matrix<br>M)          | <input type="radio"/>      | <input type="radio"/>     |
| Moderna RNA (USA):<br>mRNA-1273                                                                                                                              | <input type="radio"/>      | <input type="radio"/>     |
| CanSino (China)<br>(Adenovirus type 5)                                                                                                                       | <input type="radio"/>      | <input type="radio"/>     |
| Gamaleya (Russia):<br>Sputnik V non<br>replicating viral vector<br>Adenovirus                                                                                | <input type="radio"/>      | <input type="radio"/>     |

\* 22. From the following COVID vaccines in phase 3 trials, how likely would you accept each one:

|                                                                                                                                                              | I will never accept to take | Not sure              | Surely I will accept  |
|--------------------------------------------------------------------------------------------------------------------------------------------------------------|-----------------------------|-----------------------|-----------------------|
| AstraZeneca:<br>(OxfordUniversity:<br>British/Swedish)<br>Non-Replicating Viral<br>Vector (chimpanzee<br>adenovirus vectored<br>vaccine (ChAdOx1<br>nCoV-19) | <input type="radio"/>       | <input type="radio"/> | <input type="radio"/> |
| Johnson and Johnson<br>(USA):<br>(adenovirus type 26<br>vector Ad26.COV2-S)                                                                                  | <input type="radio"/>       | <input type="radio"/> | <input type="radio"/> |
| Pfizer RNA (BNT162b2<br>(USA):<br>nucleoside-modified<br>messenger RNA<br>modRNA)                                                                            | <input type="radio"/>       | <input type="radio"/> | <input type="radio"/> |
| Novavax (USA):<br>protein subunit (Full<br>length recombinant<br>SARS CoV-2<br>glycoprotein<br>nanoparticle vaccine<br>adjuvanted with Matrix<br>M)          | <input type="radio"/>       | <input type="radio"/> | <input type="radio"/> |
| Moderna RNA (USA):<br>mRNA-1273                                                                                                                              | <input type="radio"/>       | <input type="radio"/> | <input type="radio"/> |
| CanSino (China)<br>(Adenovirus type 5)                                                                                                                       | <input type="radio"/>       | <input type="radio"/> | <input type="radio"/> |
| Gamaleya (Russia):<br>Sputnik V non<br>replicating viral vector<br>Adenovirus                                                                                | <input type="radio"/>       | <input type="radio"/> | <input type="radio"/> |

\* 23. What factors affected your choice your answer to the above question?

- This COVID vaccine(s) seem more efficient on preventing the infection
- Vaccine availability
- Company's reputation
- Manufacturing country
- Possibly lessor side effects from this vaccine
- from the Media coverage
- Personal preference
- Other (please specify)

## COVID-19 Vaccination perceptions of HCWs

## Changes after Corona (MERS)

**Please Choose Your Answers then Press "Next"**

\* 24. What is/are your usual source(s) of information about COVID vaccine?

(Check all that apply)

- Hospital announcements (e.g. roll-ups or newsletters)
- Official statements or press release from MOH (e.g. through SMS or newspapers)
- MOH website
- WHO website
- CDC Website
- Other internet resources
- Social Networks (like YouTube, Facebook, Twitter, WhatsApp)

## COVID-19 Vaccination perceptions of HCWs

\* 25. On a scale from 1 to 5, please rate how much worry you experienced over the past 2 weeks about contracting COVID19 Infection yourself:

1- Not worried at all      2- Little worried      3- Somewhat worried      4- Very worried      5- Extremely worried

\* 26. On a scale from 1 to 5, please rate how much worry you experienced over the past 2 weeks about transmitting the COVID19 Infection to your family:

1- Not worried at all      2- Little worried      3- Somewhat worried      4- Very worried      5- Extremely worried

\* 27. Over the last 2 weeks, how often have you been bothered by the following problems?

Not at all      Several days      More than half the days      Nearly every day

Feeling nervous,  
anxious or on edge

Not being able to stop  
or control worrying

Worrying too much  
about different things

Trouble relaxing

Being so restless that it  
is hard to sit still

Becoming easily  
annoyed or irritable

Feeling afraid as if  
something awful might  
happen

STROBE Statement—Checklist of items that should be included in reports of *cohort studies*

|                              | Item No | Recommendation                                                                                                                                                                                                                                                                                                         | Page No |
|------------------------------|---------|------------------------------------------------------------------------------------------------------------------------------------------------------------------------------------------------------------------------------------------------------------------------------------------------------------------------|---------|
| <b>Title and abstract</b>    | 1       | (a) Indicate the study's design with a commonly used term in the title or the abstract<br>(b) Provide in the abstract an informative and balanced summary of what was done and what was found                                                                                                                          | 3       |
| <b>Introduction</b>          |         |                                                                                                                                                                                                                                                                                                                        |         |
| Background/rationale         | 2       | Explain the scientific background and rationale for the investigation being reported                                                                                                                                                                                                                                   | 4       |
| Objectives                   | 3       | State specific objectives, including any prespecified hypotheses                                                                                                                                                                                                                                                       | 5       |
| <b>Methods</b>               |         |                                                                                                                                                                                                                                                                                                                        |         |
| Study design                 | 4       | Present key elements of study design early in the paper                                                                                                                                                                                                                                                                | 6       |
| Setting                      | 5       | Describe the setting, locations, and relevant dates, including periods of recruitment, exposure, follow-up, and data collection                                                                                                                                                                                        | 6       |
| Participants                 | 6       | (a) Give the eligibility criteria, and the sources and methods of selection of participants. Describe methods of follow-up<br>(b) For matched studies, give matching criteria and number of exposed and unexposed                                                                                                      | 6       |
| Variables                    | 7       | Clearly define all outcomes, exposures, predictors, potential confounders, and effect modifiers. Give diagnostic criteria, if applicable                                                                                                                                                                               | 6       |
| Data sources/<br>measurement | 8*      | For each variable of interest, give sources of data and details of methods of assessment (measurement). Describe comparability of assessment methods if there is more than one group                                                                                                                                   | 6       |
| Bias                         | 9       | Describe any efforts to address potential sources of bias                                                                                                                                                                                                                                                              | NA      |
| Study size                   | 10      | Explain how the study size was arrived at                                                                                                                                                                                                                                                                              | 7       |
| Quantitative variables       | 11      | Explain how quantitative variables were handled in the analyses. If applicable, describe which groupings were chosen and why                                                                                                                                                                                           | 7       |
| Statistical methods          | 12      | (a) Describe all statistical methods, including those used to control for confounding<br>(b) Describe any methods used to examine subgroups and interactions<br>(c) Explain how missing data were addressed<br>(d) If applicable, explain how loss to follow-up was addressed<br>(e) Describe any sensitivity analyses | 7       |
| <b>Results</b>               |         |                                                                                                                                                                                                                                                                                                                        |         |
| Participants                 | 13*     | (a) Report numbers of individuals at each stage of study—eg numbers potentially eligible, examined for eligibility, confirmed eligible, included in the study, completing follow-up, and analysed<br>(b) Give reasons for non-participation at each stage<br>(c) Consider use of a flow diagram                        | 7       |
| Descriptive data             | 14*     | (a) Give characteristics of study participants (eg demographic, clinical, social) and information on exposures and potential confounders<br>(b) Indicate number of participants with missing data for each variable of interest<br>(c) Summarise follow-up time (eg, average and total amount)                         | 7-8     |
| Outcome data                 | 15*     | Report numbers of outcome events or summary measures over time                                                                                                                                                                                                                                                         | 9       |

|    |                          |    |                                                                                                                                                                                                              |      |
|----|--------------------------|----|--------------------------------------------------------------------------------------------------------------------------------------------------------------------------------------------------------------|------|
| 1  | Main results             | 16 | (a) Give unadjusted estimates and, if applicable, confounder-adjusted estimates and their precision (eg, 95% confidence interval). Make clear which confounders were adjusted for and why they were included | 7-9  |
| 2  |                          |    | (b) Report category boundaries when continuous variables were categorized                                                                                                                                    |      |
| 3  |                          |    | (c) If relevant, consider translating estimates of relative risk into absolute risk for a meaningful time period                                                                                             |      |
| 4  |                          |    |                                                                                                                                                                                                              |      |
| 5  |                          |    |                                                                                                                                                                                                              |      |
| 6  |                          |    |                                                                                                                                                                                                              |      |
| 7  |                          |    |                                                                                                                                                                                                              |      |
| 8  |                          |    |                                                                                                                                                                                                              |      |
| 9  | Other analyses           | 17 | Report other analyses done—eg analyses of subgroups and interactions, and sensitivity analyses                                                                                                               | 9-11 |
| 10 |                          |    |                                                                                                                                                                                                              |      |
| 11 | <b>Discussion</b>        |    |                                                                                                                                                                                                              |      |
| 12 |                          |    |                                                                                                                                                                                                              |      |
| 13 | Key results              | 18 | Summarise key results with reference to study objectives                                                                                                                                                     | 12   |
| 14 | Limitations              | 19 | Discuss limitations of the study, taking into account sources of potential bias or imprecision. Discuss both direction and magnitude of any potential bias                                                   | 14   |
| 15 |                          |    |                                                                                                                                                                                                              |      |
| 16 | Interpretation           | 20 | Give a cautious overall interpretation of results considering objectives, limitations, multiplicity of analyses, results from similar studies, and other relevant evidence                                   | 14   |
| 17 |                          |    |                                                                                                                                                                                                              |      |
| 18 |                          |    |                                                                                                                                                                                                              |      |
| 19 | Generalisability         | 21 | Discuss the generalisability (external validity) of the study results                                                                                                                                        | 14   |
| 20 |                          |    |                                                                                                                                                                                                              |      |
| 21 | <b>Other information</b> |    |                                                                                                                                                                                                              |      |
| 22 | Funding                  | 22 | Give the source of funding and the role of the funders for the present study and, if applicable, for the original study on which the present article is based                                                | 2    |
| 23 |                          |    |                                                                                                                                                                                                              |      |
| 24 |                          |    |                                                                                                                                                                                                              |      |

25  
26 \*Give information separately for exposed and unexposed groups.

27  
28 **Note:** An Explanation and Elaboration article discusses each checklist item and gives methodological background and  
29 published examples of transparent reporting. The STROBE checklist is best used in conjunction with this article (freely  
30 available on the Web sites of PLoS Medicine at <http://www.plosmedicine.org/>, Annals of Internal Medicine at  
31 <http://www.annals.org/>, and Epidemiology at <http://www.epidem.com/>). Information on the STROBE Initiative is  
32 available at <http://www.strobe-statement.org>.  
33  
34  
35  
36  
37  
38  
39  
40  
41  
42  
43  
44  
45  
46  
47  
48  
49  
50  
51  
52  
53  
54  
55  
56  
57  
58  
59  
60
